# Supplementary material for: Copper catalysed oxidative cascade deamination/cyclization of vinyl azide and benzylamine for the synthesis of 2,4,6-triarylpyridines
Source: Royal Society of Chemistry journal article supplement (doi:10.1039/d3ob00625e), 2023-01-01

## Supporting Information

### Copper catalyzed oxidative cascade deamination/cyclization of vinyl azide and benzylamine for the synthesis of 2,4,6-triarylpyridines

Rana Chatterjee,\*<sup>a</sup> Swadhapriya Bhukta,<sup>a</sup> Kishore Kumar Angajala<sup>b</sup> and Rambabu Dandela\*<sup>a</sup>

*<sup>a</sup>Department of Industrial and Engineering Chemistry,*

*Institute of Chemical Technology, Indian Oil Odisha Campus, Samantpuri, Bhubaneswar*

*751013, India*

*<sup>b</sup>Department of Humanities and Sciences, Vardhaman College of Engineering, Shamshabad,*

*Hyderabad-501218, Telangana, India.*

#### **Table of contents**

##### **1 Experimental Section**

**1.1 General information.....S2**

**1.2 Synthesis of trisubstituted pyridine.....S2**

##### **2 Characterization data**

**2.1. X-ray crystallographic data.....S3**

**2.2 <sup>1</sup>H and <sup>13</sup>C data of the compounds .....S10**

**2.3 References.....S7**

**3. Copies of <sup>1</sup>H and <sup>13</sup>C NMR Spectra.....S9**

## 1. Experimental Section

### 1.1. General Information

All starting materials and commercial reagent were purchased from Alfa Aesar, Sigma Aldrich, Avra, Spectrochem, TCI. Thin Layer Chromatography plates were visualized by exposure to ultraviolet light (UV) with 254 nm of wavelength and then further analyzed by using iodine chamber. Thin-layer chromatography was performed using pre-coated plates. Column chromatography was performed in 120 to 200 mesh size silica gel. The reactions were carried out in round bottom flask and sealed tube. and all NMR spectra were recorded by Bruker Avance 400 spectrometer ( $^1\text{H}$  at 400 MHz and  $^{13}\text{C}$  at 100 MHz). Chemical shifts for  $^1\text{H}$  NMR spectra have been reported in parts per million (ppm) from tetramethylsilane with the solvent resonance as the internal standard ( $\text{CDCl}_3$ :  $\delta$  7.26 ppm). Similarly,  $^{13}\text{C}$  NMR spectra have been reported in parts per million (ppm) from tetramethylsilane with the solvent as the internal standard ( $\text{CDCl}_3$ :  $\delta$  77.0 ppm). The  $^1\text{H}$  NMR and  $^{13}\text{C}$  NMR of the known products were compared with literature reports.

### 1.2 Synthesis of trisubstituted pyridine (3):

In a 25 mL round bottom flask, vinyl azide (**1**) (290 mg, 2 mmol), iodine (76 mg, 30 mol%) was added in 2 mL DMF solvent at oxygen atmosphere (balloon pressure). The resulting mixture was stirred at 60 °C to 70 °C for 30 minutes, after that  $\text{Cu}(\text{OTf})_2$  (36 mg, 10 mol%) and benzyl amine (**2**, 107 mg, 1.0 mmol) was added to the reaction mixture and temperature was raised to 95 °C for another 12 h. After the reaction completed, monitoring by TLC, 10 mL of cold water was added to the mixture, then extracted with EtOAc three times ( $3 \times 15$  mL). The extract was washed with 10%  $\text{Na}_2\text{SO}_3$  solution (w/w), dried over anhydrous  $\text{Na}_2\text{SO}_4$  and evaporation. The residue was purified by column chromatography on silica gel (petroleum ether/EtOAc = 25:1) to yield the desired product **3** as a pale-yellow solid.

## 2. Characterization data

### 2.1. X-ray crystallographic data for 3h:

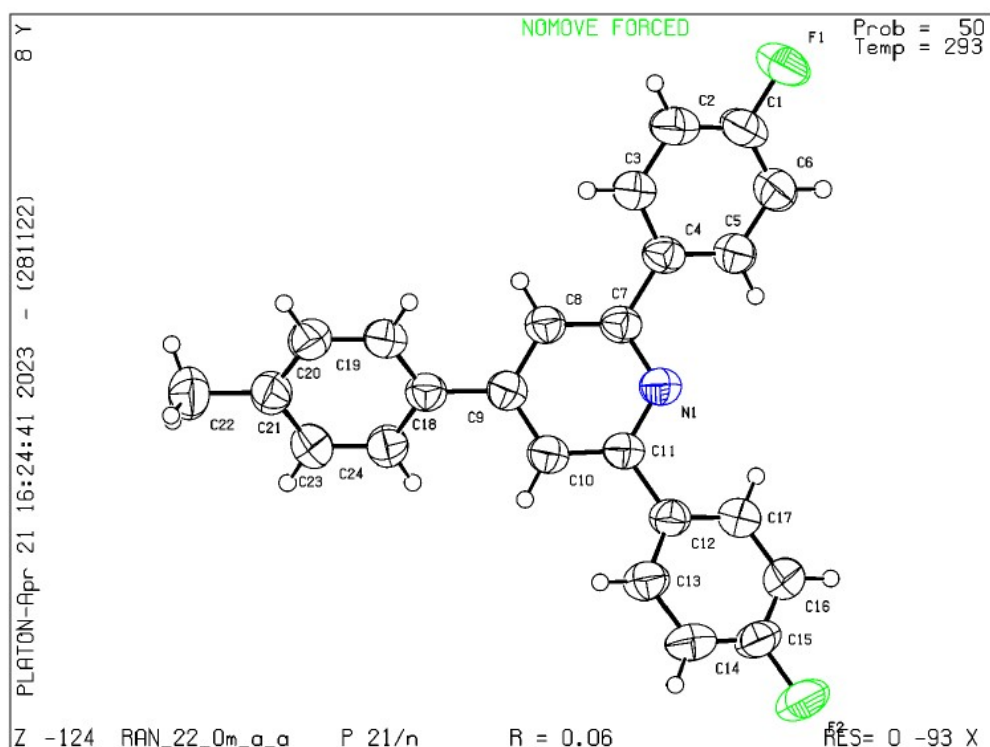

**Fig. 1.** X-ray crystal structure of **3h** with 50% ellipsoid probability

The crystallographic data have been deposited with the Cambridge Crystallographic Data Centre as supplementary publication with a CCDC reference number CCDC **2258109**.

#### Data collection and structure solution details:

The quality single crystals suitable for SC-XRD experiments of the compound were obtained from ethyl acetate and *n*-hexane solvent by the slow evaporation method. The single-crystal X-ray diffraction measurements were performed to determine the crystal structure of compounds at 273 K using APEX3 (Bruker, 2016; Bruker D8 Venture photon 100 CMOS detector) diffractometer having graphite-monochromatized ( $\text{MoK}\alpha = 0.71073 \text{ \AA}$ ). The X-ray generator was operated at 50 kV and 30 mA. A preliminary set of unit cell parameters and an orientation matrix were calculated from 36 frames, and the cell refinement was performed by SAINT-Plus (Bruker, 2016). An optimized strategy used for data collection consisted of different sets of  $\varphi$  and  $\omega$  scans with  $0.5^\circ$  steps  $\varphi/\omega$ . The data were collected within a time frame of 10 sec for the three components by setting the sample to detector distance fixed at 40 cm. The data points were corrected for Lorentzian, polarization, and absorption effects using SAINT-Plus and

SADABS programs (Bruker, 2016). SHELXS-97 (Sheldrick, 2018) was used for structure solution and full-matrix least-squares refinement on F. The program(s) used to refine the molecular structures of compounds 1-3 is SHELXL 2018/3 (Sheldrick, 2018). All non-hydrogen atoms were refined by the anisotropic method and hydrogen atoms were either refined or placed in calculated positions. All the structural refinements converged to good R-factors, as listed in Table 1, and the intermolecular interactions were computed by using PLATON software. The molecular graphics of ORTEP diagrams were performed by XP software. The crystal symmetry of the three components was cross-checked by running the .cif files through PLATON (Spek, 2020) software and notified that no additional symmetry was observed. The single-crystal data the crystal was collected on a Bruker diffractometer. The diffractometer is equipped with an APEX CCD area detector, using graphite-monochromatic Mo.K $\alpha$  radiation ( $\lambda = 0.71073 \text{ \AA}$ ). The data were collected in a  $\varphi$  and  $\omega$  scan modes at room temperature and in all the cases the process was smooth and the crystals were found to be stable throughout the duration of the experiment. Bruker suite of data processing programme (SAINT) (SAINT; Bruker AXS, I. Analytical X-ray Systems 2000, 5373) has been used to process the intensity data and absorption corrections were applied using SADABS (SADABS; Siemens Industrial Automation, I. 1996). The structure solution for all the complexes has been carried out by direct methods and refinements were performed by full-matrix least-squares on F2 using the SHELXTL-PLUS suite of programs<sup>39</sup> All the non-hydrogen atoms were refined anisotropically and all the hydrogen atoms were fixed using AFIX constraint.

**Table 1 Crystal data and structure refinement for 3h.**

|                     |                                                  |
|---------------------|--------------------------------------------------|
| Identification code | 3h                                               |
| Empirical formula   | C <sub>24</sub> H <sub>17</sub> F <sub>2</sub> N |
| Formula weight      | 357.38                                           |
| Temperature/K       | 293(2)                                           |
| Crystal shape       | block                                            |
| Crystal colour      | colourless                                       |
| Crystal system      | monoclinic                                       |
| Space group         | P2 <sub>1</sub> /n                               |
| a/Å                 | 11.748(13)                                       |
| b/Å                 | 7.359(5)                                         |
| c/Å                 | 21.472(14)                                       |

|                                               |                                                               |
|-----------------------------------------------|---------------------------------------------------------------|
| $\alpha/^\circ$                               | 90                                                            |
| $\beta/^\circ$                                | 94.50(3)                                                      |
| $\gamma/^\circ$                               | 90                                                            |
| Volume/ $\text{\AA}^3$                        | 1851(3)                                                       |
| Z                                             | 4                                                             |
| $\rho_{\text{calc}}/\text{g/cm}^3$            | 1.283                                                         |
| $\mu/\text{mm}^{-1}$                          | 0.088                                                         |
| F(000)                                        | 744.0                                                         |
| Crystal size/ $\text{mm}^3$                   | $0.24 \times 0.22 \times 0.2$                                 |
| Radiation                                     | MoK $\alpha$ ( $\lambda = 0.71073$ )                          |
| $2\Theta$ range for data collection/ $^\circ$ | 5.854 to 52.568                                               |
| Index ranges                                  | $-14 \leq h \leq 14, -9 \leq k \leq 9, -26 \leq l \leq 25$    |
| Reflections collected                         | 27658                                                         |
| Independent reflections                       | 3738 [ $R_{\text{int}} = 0.0996, R_{\text{sigma}} = 0.0590$ ] |
| Data/restraints/parameters                    | 3738/0/246                                                    |
| Goodness-of-fit on $F^2$                      | 1.089                                                         |
| Final R indexes [ $I \geq 2\sigma(I)$ ]       | $R_1 = 0.0571, wR_2 = 0.1466$                                 |
| Final R indexes [all data]                    | $R_1 = 0.1056, wR_2 = 0.1909$                                 |
| Largest diff. peak/hole / $e \text{\AA}^{-3}$ | 0.17/-0.19                                                    |

**Table 2 Fractional Atomic Coordinates ( $\times 10^4$ ) and Equivalent Isotropic Displacement Parameters ( $\text{\AA}^2 \times 10^3$ ) for 3h.  $U_{\text{eq}}$  is defined as 1/3 of the trace of the orthogonalised  $U_{ij}$  tensor.**

| Atom | x           | y        | z           | $U(\text{eq})$ |
|------|-------------|----------|-------------|----------------|
| F2   | 748.6 (11)  | 9065 (3) | 6640.8 (8)  | 100.5 (6)      |
| F1   | 9480.7 (15) | 7281 (3) | 9545.3 (7)  | 104.8 (6)      |
| N1   | 6039.1 (15) | 7605 (2) | 7134.7 (8)  | 55.2 (5)       |
| C7   | 7175.0 (18) | 7310 (3) | 7152.2 (10) | 52.8 (5)       |
| C4   | 7798.0 (18) | 7299 (3) | 7789.2 (10) | 54.1 (6)       |
| C8   | 7733.6 (19) | 7030 (3) | 6614.7 (10) | 56.4 (6)       |
| C18  | 7720.4 (18) | 6839 (3) | 5447.4 (10) | 55.8 (6)       |
| C12  | 4198.8 (18) | 8026 (3) | 6577.2 (10) | 56.2 (6)       |
| C24  | 7205 (2)    | 5912 (3) | 4932.7 (10) | 64.1 (6)       |
| C9   | 7131.9 (18) | 7090 (3) | 6028.9 (10) | 54.5 (5)       |
| C11  | 5445.8 (18) | 7665 (3) | 6568.1 (10) | 53.1 (5)       |
| C21  | 8868 (2)    | 6314 (3) | 4347.9 (11) | 64.6 (6)       |
| C13  | 3584.4 (19) | 8940 (3) | 6090.3 (11) | 66.4 (6)       |

**Table 2 Fractional Atomic Coordinates ( $\times 10^4$ ) and Equivalent Isotropic Displacement Parameters ( $\text{\AA}^2 \times 10^3$ ) for 3h.  $U_{\text{eq}}$  is defined as 1/3 of the trace of the orthogonalised  $U_{ij}$  tensor.**

| Atom | x           | y        | z           | $U(\text{eq})$ |
|------|-------------|----------|-------------|----------------|
| C10  | 5965.7 (19) | 7418 (3) | 6014.9 (11) | 57.3 (6)       |
| C3   | 8946 (2)    | 7761 (3) | 7876.2 (11) | 65.1 (6)       |
| C23  | 7772 (2)    | 5664 (3) | 4396.8 (11) | 68.1 (7)       |
| C19  | 8822 (2)    | 7510 (4) | 5396.9 (11) | 66.2 (7)       |
| C20  | 9377 (2)    | 7250 (4) | 4858.2 (12) | 70.4 (7)       |
| C5   | 7230 (2)    | 6849 (3) | 8310.4 (10) | 62.6 (6)       |
| C17  | 3613 (2)    | 7453 (4) | 7081.7 (11) | 68.6 (7)       |
| C15  | 1899.3 (19) | 8717 (4) | 6617.4 (13) | 70.7 (7)       |
| C14  | 2425 (2)    | 9291 (4) | 6112.5 (13) | 74.0 (7)       |
| C16  | 2455 (2)    | 7793 (4) | 7107.3 (13) | 78.1 (8)       |
| C22  | 9478 (2)    | 6042 (5) | 3762.9 (12) | 90.2 (9)       |
| C6   | 7788 (2)    | 6848 (4) | 8901.3 (11) | 71.6 (7)       |
| C2   | 9516 (2)    | 7763 (4) | 8469.0 (12) | 72.8 (7)       |
| C1   | 8916 (2)    | 7298 (4) | 8961.8 (11) | 71.2 (7)       |

**Table 3 Anisotropic Displacement Parameters ( $\text{\AA}^2 \times 10^3$ ) for 3h. The Anisotropic displacement factor exponent takes the form:  $-2\pi^2[h^2a^*2U_{11}+2hka^*b^*U_{12}+\dots]$ .**

| Atom | $U_{11}$   | $U_{22}$   | $U_{33}$   | $U_{23}$   | $U_{13}$   | $U_{12}$  |
|------|------------|------------|------------|------------|------------|-----------|
| F2   | 48.0 (8)   | 134.2 (15) | 118.2 (13) | -20.1 (11) | -0.2 (8)   | 11.9 (8)  |
| F1   | 101.8 (13) | 143.1 (17) | 64.2 (9)   | -10.2 (9)  | -28.0 (8)  | 14.8 (11) |
| N1   | 51.4 (11)  | 55.2 (11)  | 57.9 (11)  | -1.9 (8)   | -2.7 (8)   | 3.0 (8)   |
| C7   | 52.9 (12)  | 47.7 (12)  | 56.5 (12)  | -1.9 (9)   | -3.4 (9)   | 3.8 (9)   |
| C4   | 55.1 (13)  | 48.8 (12)  | 56.7 (13)  | -2.9 (9)   | -5.5 (10)  | 7.5 (10)  |
| C8   | 52.0 (12)  | 59.6 (14)  | 56.8 (13)  | -3.0 (10)  | -0.9 (10)  | 5.9 (10)  |
| C18  | 53.9 (13)  | 57.6 (13)  | 55.4 (12)  | 1.2 (10)   | 0.1 (9)    | 3.9 (10)  |
| C12  | 50.7 (12)  | 60.3 (14)  | 56.5 (13)  | -5.5 (10)  | -2.6 (9)   | 0.9 (10)  |
| C24  | 59.3 (14)  | 71.0 (16)  | 62.0 (14)  | -4.4 (11)  | 5.6 (11)   | -7.0 (12) |
| C9   | 56.6 (13)  | 52.1 (13)  | 54.4 (12)  | -1.3 (9)   | 1.8 (10)   | 2.5 (10)  |
| C11  | 51.1 (12)  | 51.0 (12)  | 55.9 (12)  | -1.6 (9)   | -4.3 (9)   | 2.4 (10)  |
| C21  | 66.3 (15)  | 69.0 (16)  | 59.0 (14)  | 10.2 (11)  | 8.3 (11)   | 10.5 (12) |
| C13  | 55.3 (14)  | 70.8 (16)  | 72.1 (15)  | 8.3 (12)   | -1.2 (11)  | 1.9 (12)  |
| C10  | 56.0 (13)  | 59.0 (14)  | 55.6 (13)  | -1.1 (10)  | -3.4 (10)  | 2.9 (10)  |
| C3   | 58.3 (14)  | 74.0 (16)  | 62.0 (14)  | 1.3 (11)   | -2.3 (11)  | -0.1 (12) |
| C23  | 74.8 (16)  | 70.9 (16)  | 58.4 (14)  | -4.7 (11)  | 3.4 (11)   | -0.5 (13) |
| C19  | 57.6 (14)  | 79.5 (17)  | 60.0 (14)  | 2.6 (11)   | -3.9 (11)  | -1.6 (12) |
| C20  | 55.5 (14)  | 86.7 (19)  | 68.9 (15)  | 9.4 (13)   | 5.0 (11)   | -1.8 (13) |
| C5   | 60.3 (14)  | 67.6 (15)  | 59.2 (14)  | -2.1 (11)  | -0.5 (10)  | 4.3 (11)  |
| C17  | 58.5 (14)  | 88.2 (18)  | 57.9 (14)  | -2.0 (12)  | -2.5 (11)  | 3.3 (13)  |
| C15  | 43.8 (13)  | 84.3 (18)  | 83.0 (17)  | -18.2 (14) | -1.7 (12)  | 3.8 (12)  |
| C14  | 55.5 (14)  | 76.5 (17)  | 87.4 (18)  | 3.1 (14)   | -10.8 (13) | 7.9 (13)  |

**Table 3 Anisotropic Displacement Parameters ( $\text{\AA}^2 \times 10^3$ ) for 3h. The Anisotropic displacement factor exponent takes the form:  $-2\pi^2[h^2a^{*2}U_{11}+2hka^*b^*U_{12}+\dots]$ .**

| Atom | $U_{11}$  | $U_{22}$  | $U_{33}$  | $U_{23}$   | $U_{13}$   | $U_{12}$  |
|------|-----------|-----------|-----------|------------|------------|-----------|
| C16  | 58.7 (15) | 110 (2)   | 66.1 (15) | -10.4 (14) | 5.7 (12)   | -1.0 (14) |
| C22  | 91 (2)    | 112 (2)   | 71.0 (17) | 9.7 (15)   | 24.4 (14)  | 11.0 (17) |
| C6   | 74.7 (17) | 80.3 (18) | 59.0 (14) | -0.3 (12)  | 0.1 (12)   | 7.7 (14)  |
| C2   | 61.2 (15) | 79.2 (18) | 75.1 (17) | -4.6 (13)  | -13.5 (12) | 0.8 (13)  |
| C1   | 78.7 (18) | 76.3 (17) | 55.1 (14) | -7.6 (12)  | -16.6 (12) | 12.4 (14) |

**Table 4 Bond Lengths for 3h.**

| Atom | Atom | Length/ $\text{\AA}$ | Atom | Atom | Length/ $\text{\AA}$ |
|------|------|----------------------|------|------|----------------------|
| F2   | C15  | 1.381 (3)            | C24  | C23  | 1.386 (3)            |
| F1   | C1   | 1.371 (3)            | C9   | C10  | 1.389 (3)            |
| N1   | C7   | 1.350 (3)            | C11  | C10  | 1.390 (3)            |
| N1   | C11  | 1.355 (3)            | C21  | C23  | 1.385 (4)            |
| C7   | C4   | 1.500 (3)            | C21  | C20  | 1.389 (4)            |
| C7   | C8   | 1.387 (3)            | C21  | C22  | 1.507 (3)            |
| C4   | C3   | 1.389 (3)            | C13  | C14  | 1.391 (4)            |
| C4   | C5   | 1.387 (3)            | C3   | C2   | 1.391 (3)            |
| C8   | C9   | 1.394 (3)            | C19  | C20  | 1.385 (3)            |
| C18  | C24  | 1.396 (3)            | C5   | C6   | 1.382 (3)            |
| C18  | C9   | 1.485 (3)            | C17  | C16  | 1.389 (4)            |
| C18  | C19  | 1.397 (3)            | C15  | C14  | 1.356 (4)            |
| C12  | C11  | 1.490 (3)            | C15  | C16  | 1.374 (4)            |
| C12  | C13  | 1.396 (3)            | C6   | C1   | 1.362 (4)            |
| C12  | C17  | 1.393 (3)            | C2   | C1   | 1.361 (4)            |

**Table 5 Bond Angles for 3h.**

| Atom | Atom | Atom | Angle/ $^\circ$ | Atom | Atom | Atom | Angle/ $^\circ$ |
|------|------|------|-----------------|------|------|------|-----------------|
| C7   | N1   | C11  | 117.92 (18)     | C23  | C21  | C20  | 117.2 (2)       |
| N1   | C7   | C4   | 115.90 (19)     | C23  | C21  | C22  | 121.5 (2)       |
| N1   | C7   | C8   | 122.1 (2)       | C20  | C21  | C22  | 121.3 (2)       |
| C8   | C7   | C4   | 122.0 (2)       | C14  | C13  | C12  | 120.9 (2)       |
| C3   | C4   | C7   | 121.4 (2)       | C9   | C10  | C11  | 120.2 (2)       |
| C5   | C4   | C7   | 120.4 (2)       | C4   | C3   | C2   | 121.1 (2)       |
| C5   | C4   | C3   | 118.2 (2)       | C21  | C23  | C24  | 121.8 (2)       |
| C7   | C8   | C9   | 120.4 (2)       | C20  | C19  | C18  | 121.0 (2)       |
| C24  | C18  | C9   | 121.6 (2)       | C19  | C20  | C21  | 121.7 (2)       |
| C24  | C18  | C19  | 117.3 (2)       | C6   | C5   | C4   | 121.1 (2)       |
| C19  | C18  | C9   | 121.1 (2)       | C16  | C17  | C12  | 121.4 (2)       |
| C13  | C12  | C11  | 121.8 (2)       | C14  | C15  | F2   | 118.6 (2)       |
| C17  | C12  | C11  | 120.2 (2)       | C14  | C15  | C16  | 123.2 (2)       |

**Table 5 Bond Angles for 3h.**

| Atom | Atom | Atom | Angle/°    | Atom | Atom | Atom | Angle/°  |
|------|------|------|------------|------|------|------|----------|
| C17  | C12  | C13  | 118.0(2)   | C16  | C15  | F2   | 118.2(2) |
| C23  | C24  | C18  | 121.0(2)   | C15  | C14  | C13  | 118.5(2) |
| C8   | C9   | C18  | 121.2(2)   | C15  | C16  | C17  | 117.8(2) |
| C10  | C9   | C8   | 117.0(2)   | C1   | C6   | C5   | 118.4(2) |
| C10  | C9   | C18  | 121.78(19) | C1   | C2   | C3   | 118.0(2) |
| N1   | C11  | C12  | 115.54(19) | C6   | C1   | F1   | 118.8(2) |
| N1   | C11  | C10  | 122.3(2)   | C2   | C1   | F1   | 118.0(3) |
| C10  | C11  | C12  | 122.20(19) | C2   | C1   | C6   | 123.1(2) |

**Table 6 Torsion Angles for 3h.**

| A   | B   | C   | D   | Angle/°    | A   | B   | C   | D   | Angle/°    |
|-----|-----|-----|-----|------------|-----|-----|-----|-----|------------|
| F2  | C15 | C14 | C13 | 179.9(2)   | C9  | C18 | C24 | C23 | -179.0(2)  |
| F2  | C15 | C16 | C17 | -179.7(2)  | C9  | C18 | C19 | C20 | 178.9(2)   |
| N1  | C7  | C4  | C3  | -153.0(2)  | C11 | N1  | C7  | C4  | 178.59(18) |
| N1  | C7  | C4  | C5  | 26.1(3)    | C11 | N1  | C7  | C8  | -1.5(3)    |
| N1  | C7  | C8  | C9  | 1.5(3)     | C11 | C12 | C13 | C14 | -178.9(2)  |
| N1  | C11 | C10 | C9  | 0.2(3)     | C11 | C12 | C17 | C16 | 179.1(2)   |
| C7  | N1  | C11 | C12 | 179.04(19) | C13 | C12 | C11 | N1  | 149.5(2)   |
| C7  | N1  | C11 | C10 | 0.6(3)     | C13 | C12 | C11 | C10 | -30.2(3)   |
| C7  | C4  | C3  | C2  | 179.5(2)   | C13 | C12 | C17 | C16 | -0.7(4)    |
| C7  | C4  | C5  | C6  | -179.4(2)  | C3  | C4  | C5  | C6  | -0.3(3)    |
| C7  | C8  | C9  | C18 | 178.5(2)   | C3  | C2  | C1  | F1  | 179.3(2)   |
| C7  | C8  | C9  | C10 | -0.7(3)    | C3  | C2  | C1  | C6  | -0.6(4)    |
| C4  | C7  | C8  | C9  | -178.5(2)  | C23 | C21 | C20 | C19 | 0.7(4)     |
| C4  | C3  | C2  | C1  | 0.1(4)     | C19 | C18 | C24 | C23 | 0.3(4)     |
| C4  | C5  | C6  | C1  | -0.2(4)    | C19 | C18 | C9  | C8  | -35.9(3)   |
| C8  | C7  | C4  | C3  | 27.1(3)    | C19 | C18 | C9  | C10 | 143.2(2)   |
| C8  | C7  | C4  | C5  | -153.8(2)  | C20 | C21 | C23 | C24 | -0.7(4)    |
| C8  | C9  | C10 | C11 | -0.2(3)    | C5  | C4  | C3  | C2  | 0.4(3)     |
| C18 | C24 | C23 | C21 | 0.2(4)     | C5  | C6  | C1  | F1  | -179.3(2)  |
| C18 | C9  | C10 | C11 | -179.3(2)  | C5  | C6  | C1  | C2  | 0.6(4)     |
| C18 | C19 | C20 | C21 | -0.1(4)    | C17 | C12 | C11 | N1  | -30.2(3)   |
| C12 | C11 | C10 | C9  | 179.8(2)   | C17 | C12 | C11 | C10 | 150.1(2)   |
| C12 | C13 | C14 | C15 | -0.4(4)    | C17 | C12 | C13 | C14 | 0.9(4)     |
| C12 | C17 | C16 | C15 | 0.0(4)     | C14 | C15 | C16 | C17 | 0.6(4)     |
| C24 | C18 | C9  | C8  | 143.4(2)   | C16 | C15 | C14 | C13 | -0.4(4)    |
| C24 | C18 | C9  | C10 | -37.5(3)   | C22 | C21 | C23 | C24 | -179.9(2)  |
| C24 | C18 | C19 | C20 | -0.4(4)    | C22 | C21 | C20 | C19 | 179.8(2)   |



**Table 7 Hydrogen Atom Coordinates ( $\text{\AA} \times 10^4$ ) and Isotropic Displacement Parameters ( $\text{\AA}^2 \times 10^3$ ) for 3h.**

| Atom | x        | y       | z       | U(eq) |
|------|----------|---------|---------|-------|
| H8   | 8514.56  | 6801.54 | 6645.2  | 68    |
| H24  | 6470.17  | 5452.83 | 4949.68 | 77    |
| H13  | 3955.6   | 9319.1  | 5746.12 | 80    |
| H10  | 5531.45  | 7472.08 | 5634.07 | 69    |
| H3   | 9339.65  | 8073.46 | 7532.58 | 78    |
| H23  | 7405.93  | 5044.6  | 4060.6  | 82    |
| H19  | 9188.4   | 8141.2  | 5730.2  | 79    |
| H20  | 10109.73 | 7713.07 | 4837.61 | 84    |
| H5   | 6460.34  | 6541.54 | 8261.31 | 75    |
| H17  | 4006.46  | 6830.49 | 7408.37 | 82    |
| H14  | 2018.62  | 9906.93 | 5788.43 | 89    |
| H16  | 2068.09  | 7407.57 | 7445.12 | 94    |
| H22A | 9151.15  | 5023.27 | 3534.05 | 135   |
| H22B | 10272.64 | 5816.51 | 3873.67 | 135   |
| H22C | 9397.5   | 7114.39 | 3508.5  | 135   |
| H6   | 7403.35  | 6548.44 | 9249.37 | 86    |
| H2   | 10284.73 | 8073.24 | 8526.74 | 87    |

## Experimental

Single crystals of  $\text{C}_{24}\text{H}_{17}\text{F}_2\text{N}$  **3h** were collected by slow evaporation. A suitable crystal was selected on a Bruker D8 quest photon detector diffractometer. The crystal was kept at 293(2) K during data collection. Using Olex2 [1], the structure was solved with the SHELXT [2] structure solution program using Intrinsic Phasing and refined with the SHELXL [3] refinement package using Least Squares minimisation.

1. Dolomanov, O.V., Bourhis, L.J., Gildea, R.J, Howard, J.A.K. & Puschmann, H. (2009), J. Appl. Cryst. 42, 339-341.
2. Sheldrick, G.M. (2015). Acta Cryst. A71, 3-8.
3. Sheldrick, G.M. (2015). Acta Cryst. C71, 3-8.

## Crystal structure determination of 3h

**Crystal Data** for  $\text{C}_{24}\text{H}_{17}\text{F}_2\text{N}$  ( $M=357.38$  g/mol): monoclinic, space group  $\text{P}2_1/\text{n}$  (no. 14),  $a = 11.748(13)$   $\text{\AA}$ ,  $b = 7.359(5)$   $\text{\AA}$ ,  $c = 21.472(14)$   $\text{\AA}$ ,  $\beta = 94.50(3)^\circ$ ,  $V = 1851(3)$   $\text{\AA}^3$ ,  $Z = 4$ ,  $T = 293(2)$  K,  $\mu(\text{MoK}\alpha) = 0.088$   $\text{mm}^{-1}$ ,  $D_{\text{calc}} = 1.283$   $\text{g/cm}^3$ , 27658 reflections measured ( $5.854^\circ \leq 2\Theta \leq 52.568^\circ$ ), 3738 unique ( $R_{\text{int}} = 0.0996$ ,  $R_{\text{sigma}} = 0.0590$ ) which were used in all calculations. The final  $R_1$  was 0.0571 ( $I > 2\sigma(I)$ ) and  $wR_2$  was 0.1909 (all data).

## Refinement model description

Number of restraints - 0, number of constraints - unknown.

Details:

1. Fixed Uiso

At 1.2 times of:

All C(H) groups

At 1.5 times of:

All C(H,H,H) groups

2.a Aromatic/amide H refined with riding coordinates:

C8 (H8), C24 (H24), C13 (H13), C10 (H10), C3 (H3), C23 (H23), C19 (H19), C20 (H20),

C5 (H5), C17 (H17), C14 (H14), C16 (H16), C6 (H6), C2 (H2)  
2.b Idealised Me refined as rotating group:  
C22 (H22A, H22B, H22C)

## 2.2. <sup>1</sup>H and <sup>13</sup>C data of compounds

### 2,4,6-triphenylpyridine (3a)<sup>1</sup>

(Yield: 90%, 276 mg); <sup>1</sup>H NMR (400 MHz, CDCl<sub>3</sub>) δ 8.12 (d, *J* = 7.1 Hz, 4H), 7.80 (s, 2H), 7.66 (d, *J* = 7.0 Hz, 2H), 7.49 – 7.39 (m, 6H), 7.40 – 7.31 (m, 3H). <sup>13</sup>C NMR (101 MHz, CDCl<sub>3</sub>) δ 157.54, 150.26, 139.59, 139.10, 129.04, 129.08, 129.01, 128.94, 128.73, 127.21, 127.18, 117.16.

### 4-phenyl-2,6-di-p-tolylpyridine (3b)<sup>1</sup>

(Yield: 84%, 281 mg); <sup>1</sup>H NMR (400 MHz, CDCl<sub>3</sub>) δ 8.15 (d, *J* = 7.4 Hz, 4H), 7.88 (s, 2H), 7.78 (d, *J* = 6.8 Hz, 2H), 7.61 – 7.47 (m, 3H), 7.36 (d, *J* = 7.3 Hz, 4H), 2.47 (s, 6H). <sup>13</sup>C NMR (101 MHz, CDCl<sub>3</sub>) δ 157.43, 150.05, 139.30, 138.99, 136.92, 129.43, 129.09, 128.89, 127.12 (d, *J* = 18.3 Hz), 116.55, 21.35.

### 2,6-bis(4-fluorophenyl)-4-phenylpyridine (3c)<sup>1</sup>

(Yield: 85%, 291 mg); <sup>1</sup>H NMR (400 MHz, CDCl<sub>3</sub>) δ 8.21 (s, 4H), 7.86 (s, 2H), 7.76 (d, *J* = 7.0 Hz, 2H), 7.55 (dt, *J* = 13.3, 6.5 Hz, 3H), 7.23 (t, *J* = 8.0 Hz, 4H). <sup>13</sup>C NMR (101 MHz, CDCl<sub>3</sub>) δ 164.92, 162.44, 156.53, 138.88, 129.03 (dd, *J* = 24.0, 6.2 Hz), 127.17, 116.75, 115.75, 115.54.

### 2,6-bis(4-chlorophenyl)-4-phenylpyridine (3d)<sup>1</sup>

(Yield: 87%, 326 mg); <sup>1</sup>H NMR (400 MHz, CDCl<sub>3</sub>) δ 8.06 (d, *J* = 8.1 Hz, 4H), 7.79 (s, 2H), 7.66 (d, *J* = 7.1 Hz, 2H), 7.47 (t, *J* = 7.0 Hz, 2H), 7.42 (d, *J* = 8.0 Hz, 5H). <sup>13</sup>C NMR (101 MHz, CDCl<sub>3</sub>) δ 156.39, 150.67, 138.71, 137.75, 135.35, 129.20, 128.94, 128.40, 127.17, 117.16.

### 2,6-bis(2-methoxyphenyl)-4-phenylpyridine (3e)<sup>2</sup>

(Yield: 67%, 245 mg); <sup>1</sup>H NMR (400 MHz, CDCl<sub>3</sub>) δ 7.94 – 7.84 (m, 4H), 7.65 (d, *J* = 7.2 Hz, 2H), 7.42 (t, *J* = 7.1 Hz, 2H), 7.36 (d, *J* = 6.9 Hz, 1H), 7.30 (t, *J* = 7.4 Hz, 2H), 7.02 (t, *J* = 7.3 Hz, 2H), 6.95 (d, *J* = 8.2 Hz, 2H), 3.81 (s, 6H). <sup>13</sup>C NMR (101 MHz, CDCl<sub>3</sub>) δ 157.17, 155.95, 147.82, 139.49, 131.62, 129.81, 129.27 (d, *J* = 61.0 Hz), 128.89 – 128.87 (m), 128.58, 127.38, 121.46, 121.11, 111.52, 77.36, 77.04, 76.72, 55.79.

### 2,6-diphenyl-4-(p-tolyl)pyridine (3f)<sup>1</sup>

(Yield: 86%, 276 mg); <sup>1</sup>H NMR (400 MHz, CDCl<sub>3</sub>) δ 8.11 (d, *J* = 7.3 Hz, 4H), 7.77 (s, 2H), 7.55 (d, *J* = 7.6 Hz, 2H), 7.42 (t, *J* = 7.2 Hz, 4H), 7.34 (t, *J* = 7.1 Hz, 2H), 7.23 (d, *J* = 7.4 Hz, 2H), 2.33 (s, 3H). <sup>13</sup>C NMR (101 MHz, CDCl<sub>3</sub>) δ 157.50, 150.12, 139.70, 139.12, 136.12, 129.87, 129.03, 128.72, 127.12 (d, *J* = 15.5 Hz), 116.94, 21.28.

### **2,4,6-tri-*p*-tolylpyridine (3g)<sup>3</sup>**

(Yield: 79%, 275 mg); <sup>1</sup>H NMR (400 MHz, CDCl<sub>3</sub>) δ 7.99 (d, *J* = 7.6 Hz, 4H), 7.70 (s, 2H), 7.52 (d, *J* = 7.4 Hz, 2H), 7.20 (d, *J* = 7.5 Hz, 6H), 2.31 (s, 9H). <sup>13</sup>C NMR (101 MHz, CDCl<sub>3</sub>) δ 157.40, 149.93, 138.95 (d, *J* = 4.4 Hz), 137.04, 136.34, 129.83, 129.43, 127.06 (d, *J* = 2.2 Hz), 116.34, 21.32 (d, *J* = 7.5 Hz).

### **2,6-bis(4-fluorophenyl)-4-(*p*-tolyl)pyridine (3h)<sup>3</sup>**

(Yield: 84%, 299 mg); <sup>1</sup>H NMR (400 MHz, CDCl<sub>3</sub>) δ 8.07 (d, *J* = 4.6 Hz), 7.69, 7.52 (d, *J* = 7.5 Hz), 7.23 (d, *J* = 7.4 Hz), 7.09 (t, *J* = 8.3 Hz), 2.34. <sup>13</sup>C NMR (101 MHz, CDCl<sub>3</sub>) δ 164.89, 162.42, 156.44, 150.34, 139.28, 135.96 – 135.55 (m), 129.89, 128.91 (d, *J* = 8.2 Hz), 126.98, 116.47, 115.71, 115.50, 21.26.

### **2,6-bis(4-chlorophenyl)-4-(*p*-tolyl)pyridine (3i)<sup>4</sup>**

(Yield: 81%, 315 mg); <sup>1</sup>H NMR (400 MHz, CDCl<sub>3</sub>) δ 8.14 (d, *J* = 7.7 Hz, 4H), 7.84 (s, 2H), 7.64 (d, *J* = 7.3 Hz, 2H), 7.50 (d, *J* = 7.8 Hz, 4H), 7.36 (d, *J* = 7.3 Hz, 2H), 2.48 (s, 3H). <sup>13</sup>C NMR (101 MHz, CDCl<sub>3</sub>) δ 156.26, 150.37, 139.37, 137.87, 135.69, 135.24, 129.91, 128.89, 128.35, 126.97, 116.81, 21.29.

### **4-(4-methoxyphenyl)-2,6-diphenylpyridine (3j)<sup>2</sup>**

(Yield: 78%, 262 mg); <sup>1</sup>H NMR (400 MHz, CDCl<sub>3</sub>) δ 8.10 (s, 4H), 7.77 (s, 2H), 7.62 (d, *J* = 7.9 Hz, 2H), 7.43 (t, *J* = 7.1 Hz, 4H), 7.36 (d, *J* = 6.9 Hz, 2H), 6.96 (d, *J* = 8.0 Hz, 2H), 3.79 (s, 3H). <sup>13</sup>C NMR (101 MHz, CDCl<sub>3</sub>) δ 160.53, 157.47, 149.70, 139.71, 131.31, 129.00, 128.70, 128.35, 127.17, 116.64, 114.58, 55.44.

### **4-(4-methoxyphenyl)-2,6-di-*p*-tolylpyridine (3k)<sup>2</sup>**

(Yield: 71%, 259 mg); <sup>1</sup>H NMR (400 MHz, CDCl<sub>3</sub>) δ 8.02 (d, *J* = 7.3 Hz, 4H), 7.72 (s, 2H), 7.62 (d, *J* = 7.9 Hz, 2H), 7.23 (d, *J* = 7.3 Hz, 4H), 6.96 (d, *J* = 8.0 Hz, 2H), 3.80 (s, 3H), 2.35 (s, 6H). <sup>13</sup>C NMR (101 MHz, CDCl<sub>3</sub>) δ 160.42, 157.37, 149.47, 138.87, 137.06, 131.56, 129.39, 128.32, 127.00, 116.03, 114.52, 55.43, 21.31.

### **2,6-bis(4-fluorophenyl)-4-(4-methoxyphenyl)pyridine (3l)<sup>2</sup>**

(Yield: 79%, 294 mg); <sup>1</sup>H NMR (400 MHz, CDCl<sub>3</sub>) δ 8.08 (d, *J* = 4.7 Hz, 4H), 7.69 (s, 2H), 7.59 (d, *J* = 7.7 Hz, 2H), 7.10 (t, *J* = 8.1 Hz, 4H), 6.96 (d, *J* = 7.8 Hz, 2H), 3.80 (s, 3H). <sup>13</sup>C NMR (101 MHz, CDCl<sub>3</sub>) δ 164.87, 162.40, 160.63, 156.44, 149.93, 135.70 (d, *J* = 3.1 Hz), 131.05, 128.90 (d, *J* = 8.3 Hz), 128.32, 116.19, 115.70, 115.49, 114.61, 55.44.

**2,6-bis(4-chlorophenyl)-4-(4-methoxyphenyl)pyridine (3m)<sup>2</sup>**

(Yield: 74%, 299 mg); <sup>1</sup>H NMR (400 MHz, CDCl<sub>3</sub>) δ 8.14 (d, *J* = 7.5 Hz, 4H), 7.84 (s, 2H), 7.71 (d, *J* = 7.5 Hz, 2H), 7.50 (d, *J* = 7.4 Hz, 4H), 7.29 (s, 1H), 7.08 (d, *J* = 7.5 Hz, 2H), 3.92 (s, 3H). <sup>13</sup>C NMR (101 MHz, CDCl<sub>3</sub>) δ 160.67, 156.31, 150.02, 137.94, 135.22, 130.90, 128.89, 128.34 (d, *J* = 3.5 Hz), 116.56, 114.63, 55.46.

**4-(4-fluorophenyl)-2,6-diphenylpyridine (3n)<sup>1</sup>**

(Yield: 82%, 266 mg); <sup>1</sup>H NMR (400 MHz, CDCl<sub>3</sub>) δ 8.12 (d, *J* = 7.1 Hz, 4H), 7.77 (s, 2H), 7.66 (d, *J* = 4.7 Hz, 2H), 7.48 – 7.38 (m, 6H), 7.19 – 7.12 (m, 2H). <sup>13</sup>C NMR (101 MHz, CDCl<sub>3</sub>) δ 157.59, 149.30, 139.32, 135.14, 129.34 – 128.65 (m), 127.20, 117.01, 116.27, 116.05, 109.92.

**4-(4-fluorophenyl)-2,6-di-p-tolylpyridine (3o)<sup>2</sup>**

(Yield: 77%, 271 mg); <sup>1</sup>H NMR (400 MHz, CDCl<sub>3</sub>) δ 8.01 (d, *J* = 7.6 Hz, 4H), 7.70 (s, 2H), 7.64 (d, *J* = 4.6 Hz, 2H), 7.24 (d, *J* = 7.6 Hz, 4H), 7.13 (t, *J* = 8.4 Hz, 2H), 2.35 (s, 6H). <sup>13</sup>C NMR (101 MHz, CDCl<sub>3</sub>) δ 164.63, 162.15, 157.49, 149.07, 139.12, 136.68, 129.43, 128.93 (d, *J* = 8.3 Hz), 127.04, 116.27 (d, *J* = 17.4 Hz), 115.96, 21.32.

**2,4,6-tris(4-fluorophenyl)pyridine (3p)<sup>3</sup>**

(Yield: 79%, 285 mg); <sup>1</sup>H NMR (400 MHz, CDCl<sub>3</sub>) δ 8.20 (d, *J* = 4.4 Hz, 2H), 7.80 (s, 1H), 7.74 (d, *J* = 4.4 Hz, 1H), 7.24 (dd, *J* = 17.8, 8.7 Hz, 3H). <sup>13</sup>C NMR (101 MHz, CDCl<sub>3</sub>) δ 164.95, 162.47, 156.61, 149.44, 135.50, 134.95, 129.07 – 128.76 (m), 116.50, 116.30, 116.08, 115.77, 115.56.

**2,6-bis(4-chlorophenyl)-4-(4-fluorophenyl)pyridine (3q)<sup>5</sup>**

(Yield: 76%, 298 mg); <sup>1</sup>H NMR (400 MHz, CDCl<sub>3</sub>) δ 8.05 (d, *J* = 7.8 Hz, 2H), 7.73 (s, 1H), 7.64 (d, *J* = 4.2 Hz, 1H), 7.44 (dd, *J* = 19.1, 7.9 Hz, 3H). <sup>13</sup>C NMR (101 MHz, CDCl<sub>3</sub>) δ 163.98, 163.72, 156.46, 149.88, 137.56, 135.47, 130.58 (d, *J* = 8.6 Hz), 129.29 (d, *J* = 15.5 Hz), 128.97, 128.47 (d, *J* = 14.2 Hz), 116.96, 116.36, 116.14, 115.55, 115.34.

**4-(4-fluorophenyl)-2,6-bis(2-methoxyphenyl)pyridine (3r)**

White solid (Yield: 64%, 246 mg, m.p: 124-127 °C); <sup>1</sup>H NMR (400 MHz, CDCl<sub>3</sub>) δ 7.86 (d, *J* = 8.8 Hz, 2H), 7.59 (d, *J* = 4.6 Hz, 1H), 7.27 (t, *J* = 7.5 Hz, 1H), 7.08 (t, *J* = 8.3 Hz, 1H), 7.00 (t, *J* = 7.1 Hz, 1H), 6.92 (d, *J* = 8.2 Hz, 1H), 3.78 (s, 3H). <sup>13</sup>C NMR (101 MHz, CDCl<sub>3</sub>) δ 164.48, 162.01, 157.16, 156.09, 146.70, 135.59 (d, *J* = 3.2 Hz), 131.61, 129.87, 129.53, 129.05 (d, *J* = 8.2 Hz), 121.18 (d, *J* = 8.5 Hz), 116.05, 115.84, 111.52, 55.77; HRMS (ESI-MS) calcd for C<sub>25</sub>H<sub>20</sub>FNO<sub>2</sub> [M+H]<sup>+</sup> : 386.1551, found: 386.1558.

#### 4-(4-fluorophenyl)-2,6-bis(4-methoxyphenyl)pyridine (3s)<sup>6</sup>

(Yield: 70%, 269 mg); <sup>1</sup>H NMR (400 MHz, CDCl<sub>3</sub>) δ 8.04 (d, *J* = 8.2 Hz, 2H), 7.59 (s, 2H), 7.09 (t, *J* = 8.3 Hz, 1H), 6.93 (d, *J* = 8.2 Hz, 2H), 3.77 (s, 3H). <sup>13</sup>C NMR (101 MHz, CDCl<sub>3</sub>) δ 164.58, 162.11, 160.61, 157.04, 148.95, 135.45 (d, *J* = 3.3 Hz), 132.22, 128.90 (d, *J* = 8.3 Hz), 128.39, 116.14, 115.92, 115.45, 114.08, 55.38.

### 2.3 References:

1. Q. Yang, Y. Zhang, W. Zeng, Z. C. Duan, X. Sang and D. Wang, *Green Chem.*, 2019, **21**, 5683.
2. R. S. Rohokale, B. Koenig and D. D. Dhavale, *J. Org. Chem.*, 2016, **81**, 7121.
3. X. Zhang, Z. Wang, K. Xu, Y. Feng, W. Zhao, X. Xu, Y. Yan and W. Yi, *Green Chem.*, 2016, **18**, 2313.
4. M. Adib, N. Ayashi and P. Mirzaei, *Synlett*, 2016, **27**, 417.
5. M. Roozifar, N. Hazeri, and H. F. Niya, *J. Heterocyclic. Chem.*, 2021, **58**, 1117.
6. F. Ling, L. Shen, Z. Pan, L. Fang, D. Song, Z. Xie and W. Zhong, *Tetrahedron Lett.*, 2018, **59**, 3678.

## **$^1\text{H}$ and $^{13}\text{C}$ NMR Spectra of Compounds**

RAN\_01

8.13  
7.80  
7.67  
7.65  
7.44  
7.43  
7.41  
7.38  
7.36  
7.34

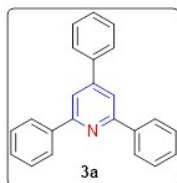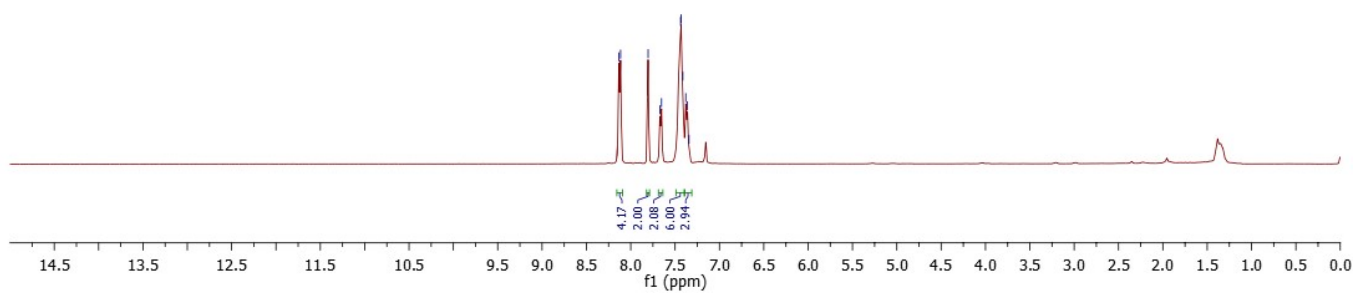

RAN\_01

157.54  
150.26  
139.59  
139.10  
129.14  
129.08  
129.01  
128.94  
128.73  
127.21  
127.18

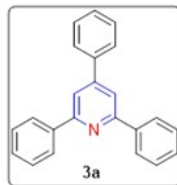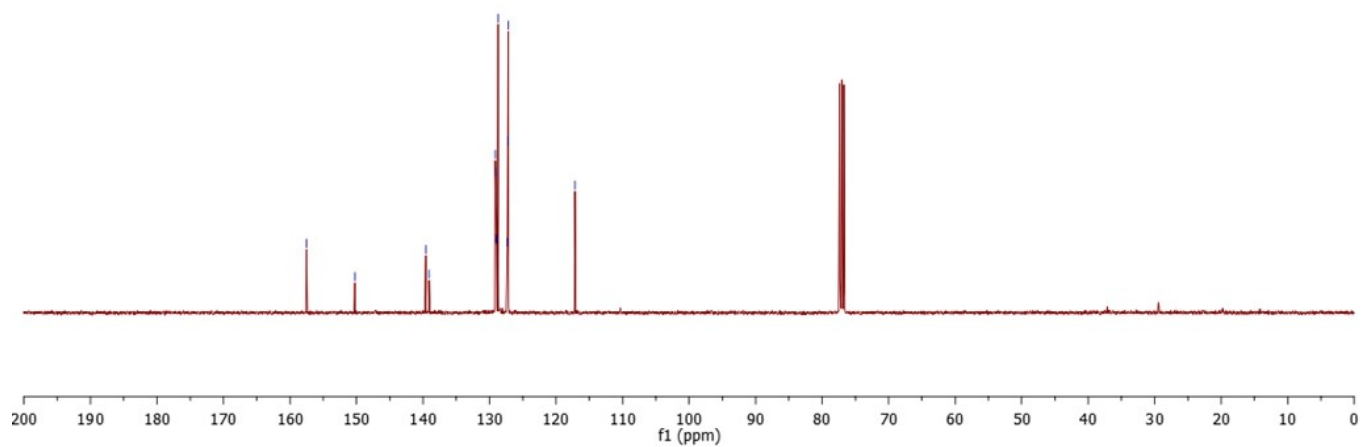



RAN-02

8.16  
8.14  
7.88  
7.79  
7.77  
7.58  
7.55  
7.52  
7.50  
7.37  
7.35

2.47

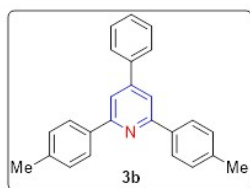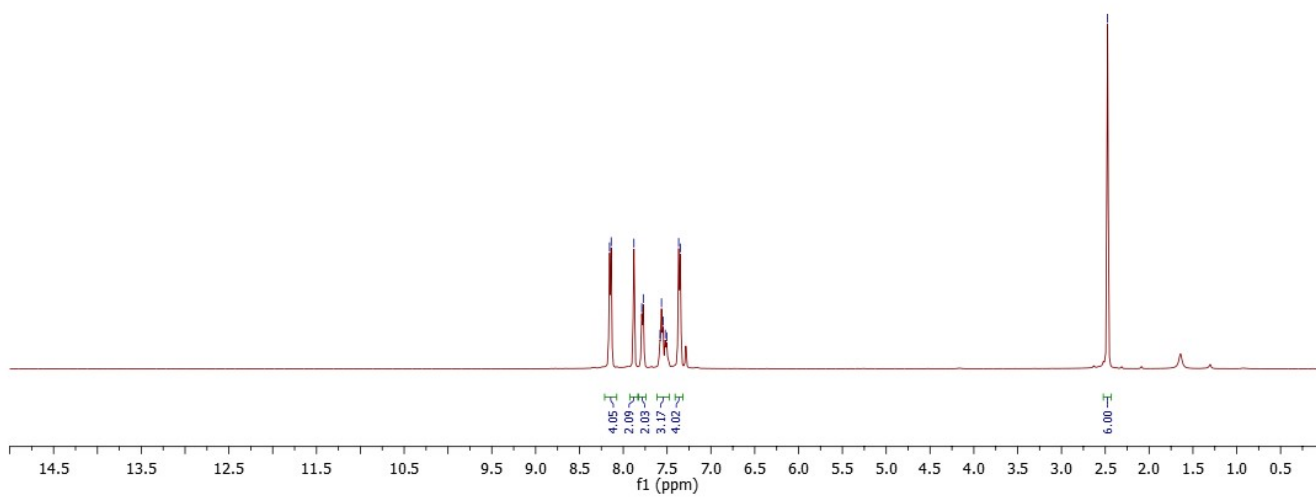

RAN-02

157.43  
150.05  
139.30  
138.09  
136.92  
129.48  
129.09  
128.89  
127.21  
127.05  
116.55

21.35

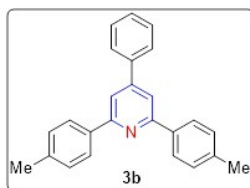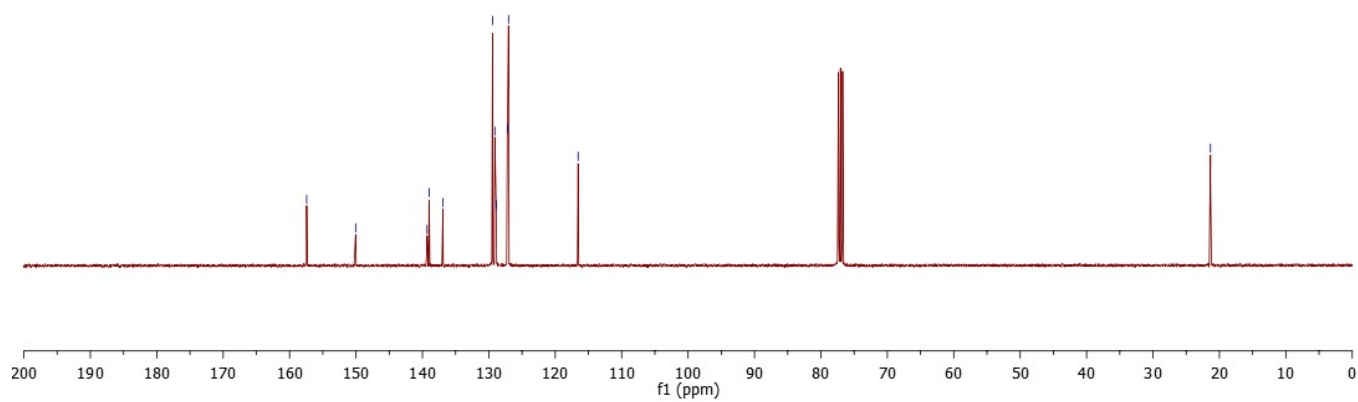

RAN\_04

8.21  
7.86  
7.77  
7.76  
7.58  
7.57  
7.55  
7.53  
7.52  
7.25  
7.23  
7.21

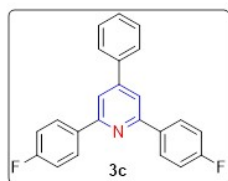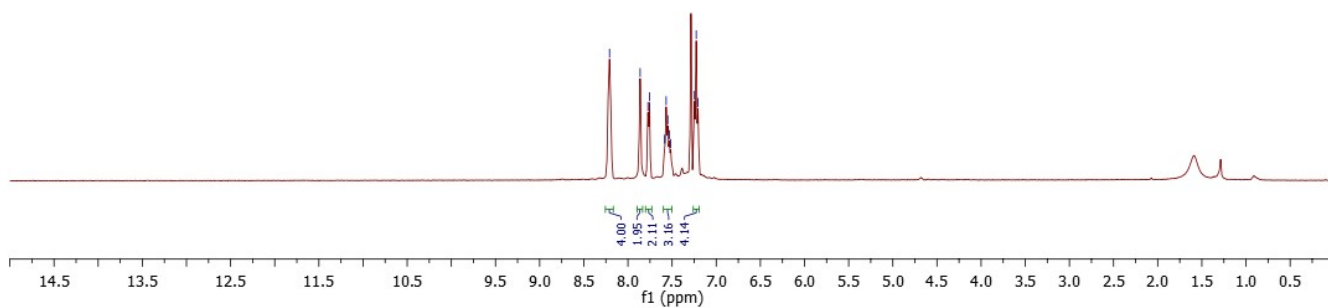

RAN\_04

164.92  
162.44  
156.53

138.88  
129.17  
129.13  
128.96  
128.87  
127.17  
116.75  
115.75  
115.54

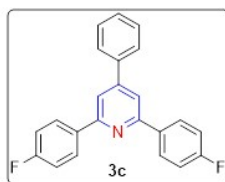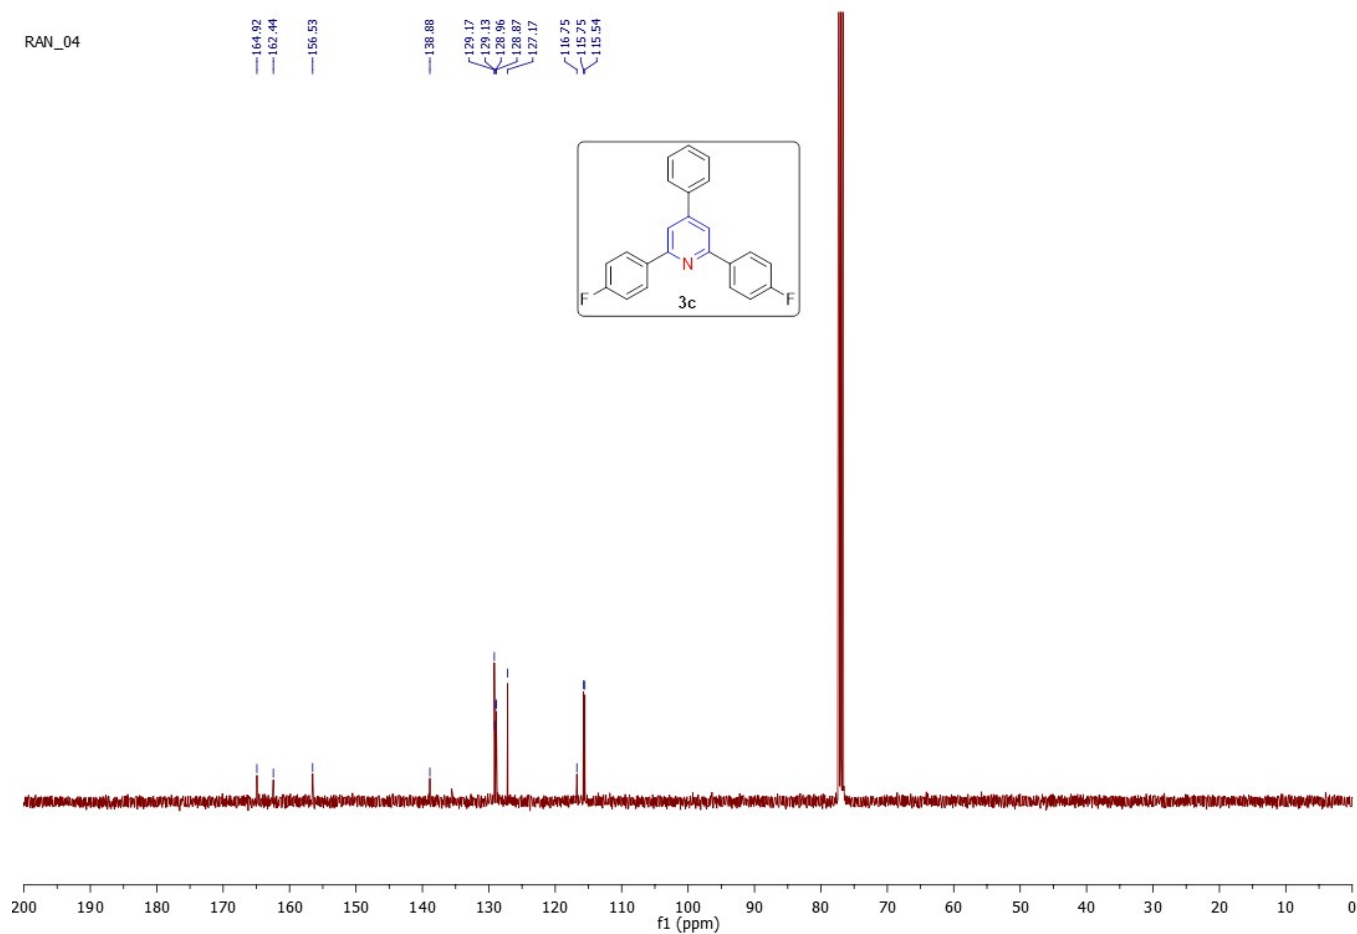

RAN\_03

8.07  
7.95  
7.73  
7.65  
7.49  
7.46  
7.43  
7.41

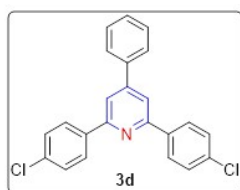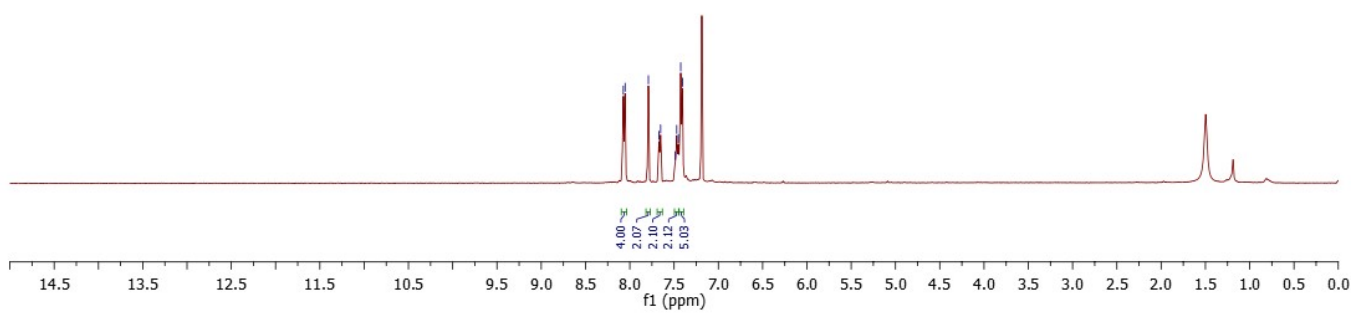

RAN\_03

156.39  
150.67  
138.71  
137.75  
135.35  
129.20  
128.94  
128.40  
127.17  
117.16

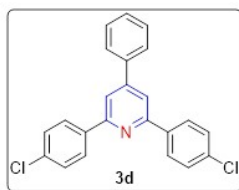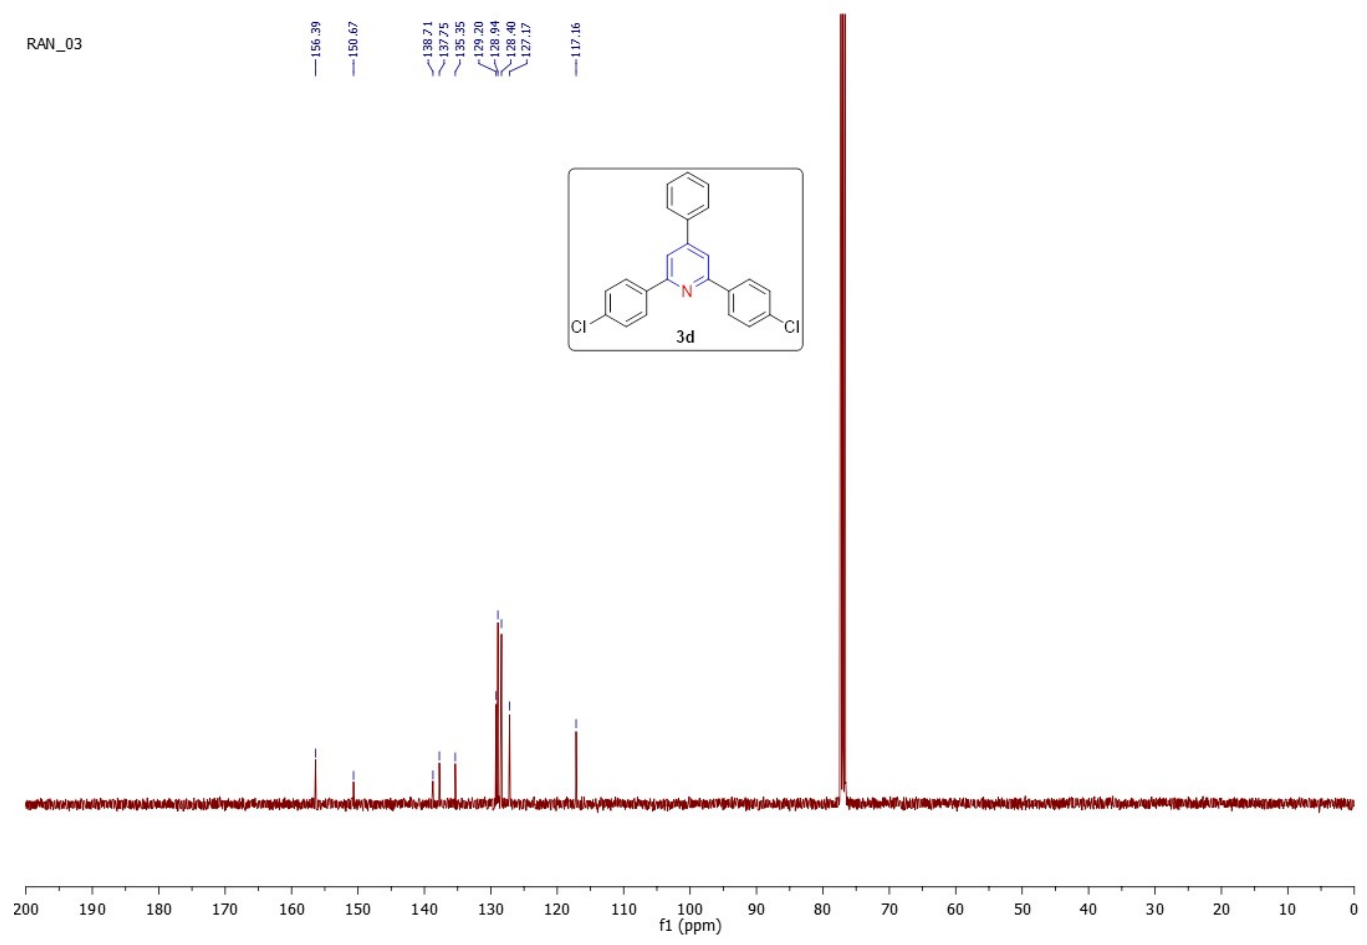

RAN\_05

7.91  
7.887  
7.87  
7.66  
7.64  
7.44  
7.42  
7.40  
7.37  
7.35  
7.31  
7.28  
7.04  
7.02  
7.00  
6.96  
6.93

3.81

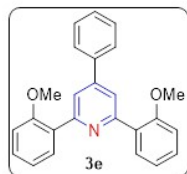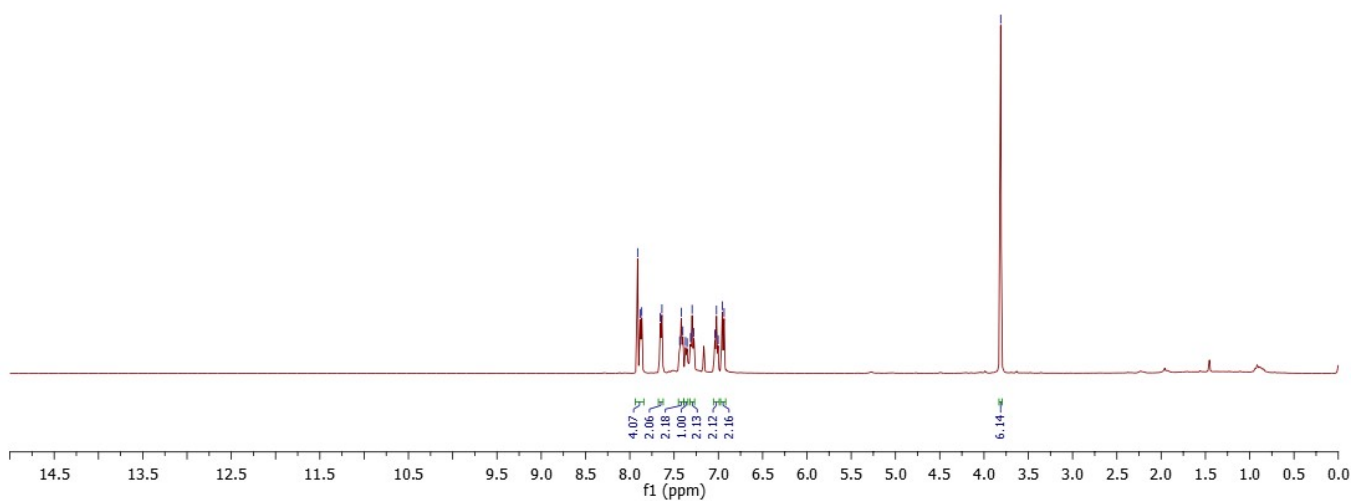

RAN\_05

157.17  
155.95  
147.82  
139.49  
131.62  
129.81  
129.57  
128.96  
128.58  
127.38  
121.46  
121.11  
111.52

55.79

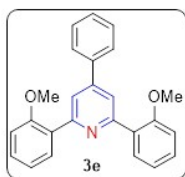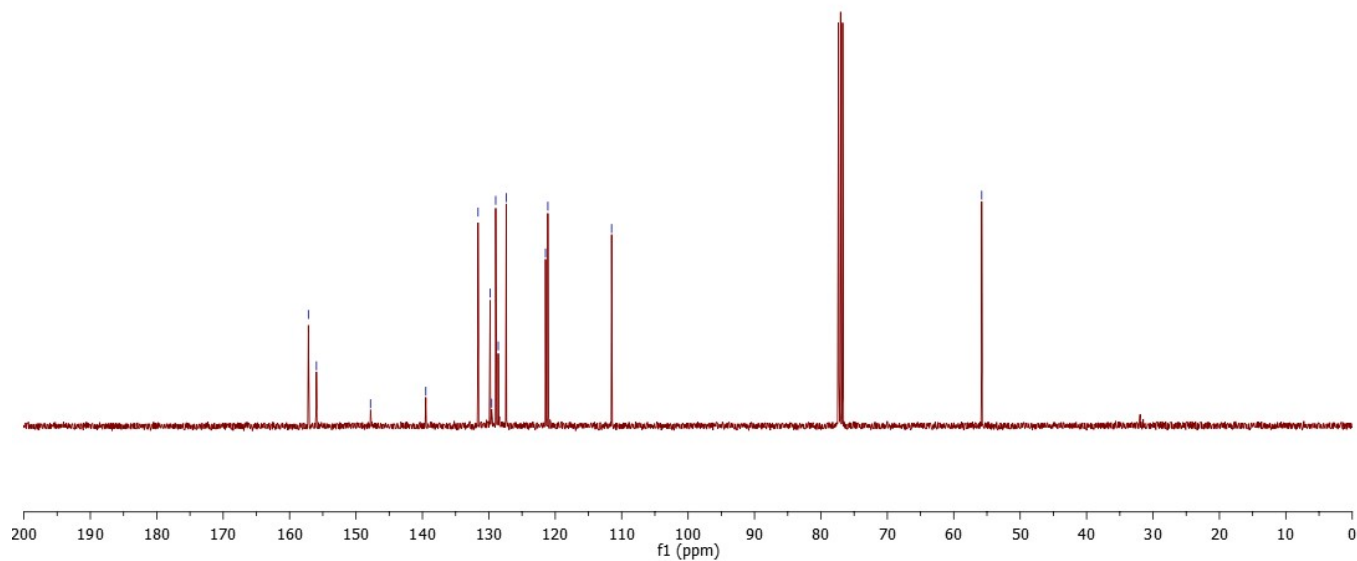



8.12  
8.10  
7.77  
7.56  
7.54  
7.43  
7.42  
7.40  
7.36  
7.34  
7.32  
7.24  
7.22

—2.33

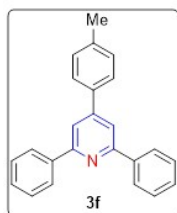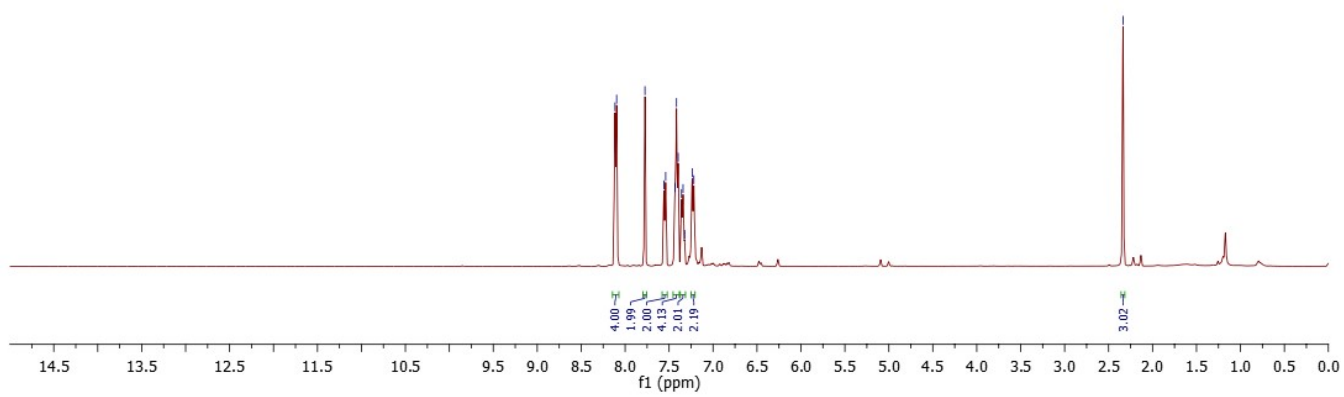

RAN\_19

157.50  
150.12  
139.70  
136.12  
129.87  
128.72  
127.19  
127.04  
116.94

21.28

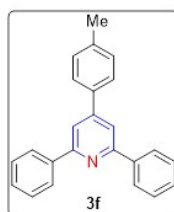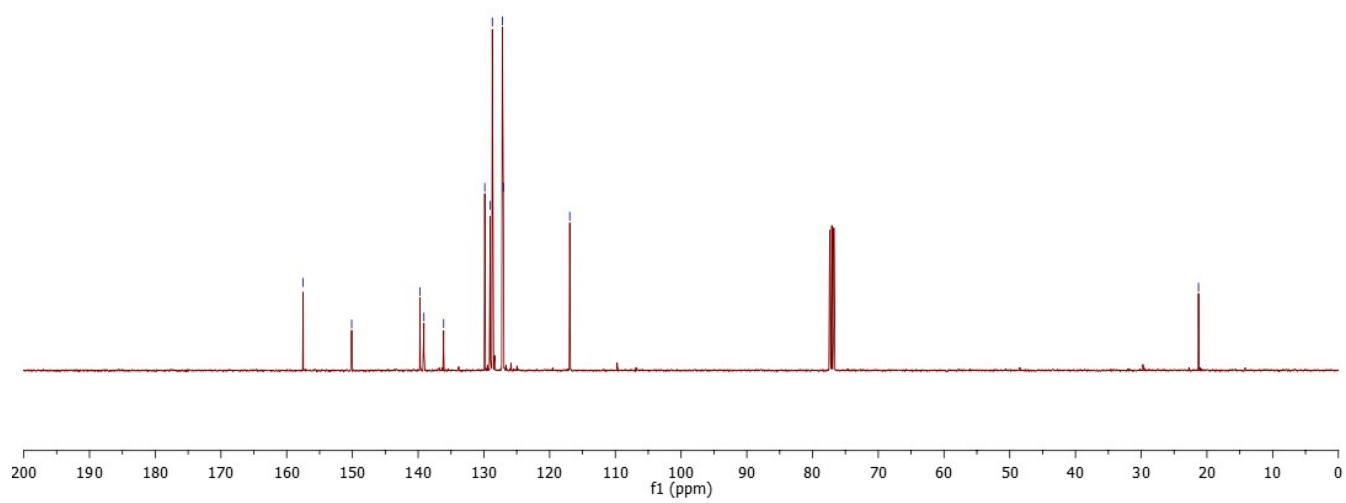

ran\_20

8.00  
7.99  
7.70  
7.53  
7.51  
7.21  
7.19

2.31

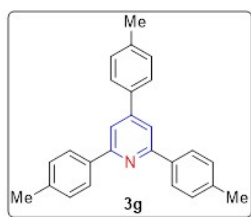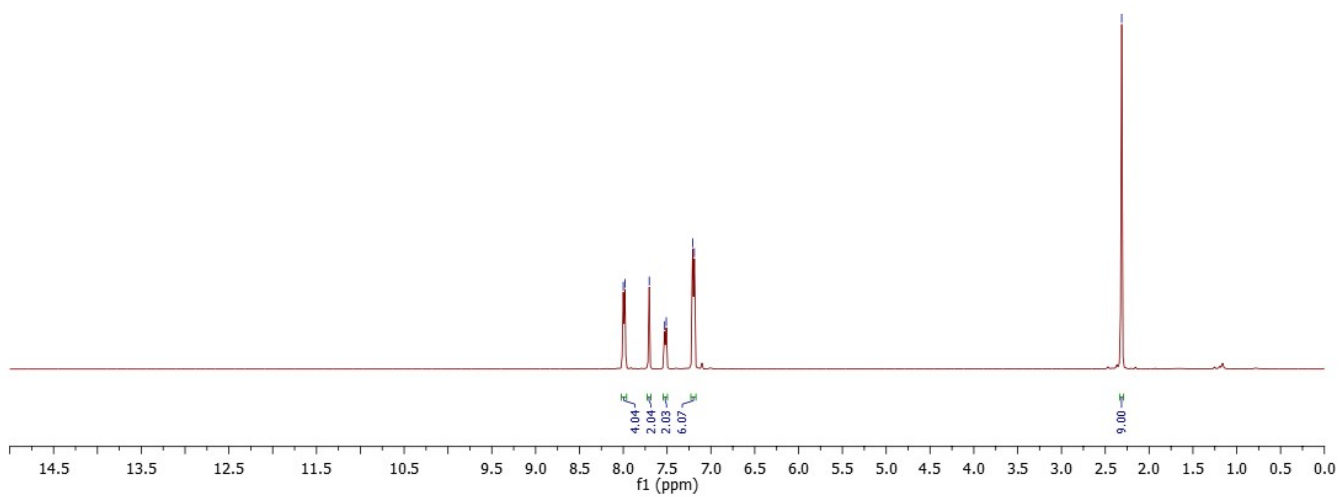

ran\_20

157.40  
149.93  
138.97  
138.93  
137.04  
136.34  
129.83  
127.07  
127.04  
116.34

21.36  
21.29

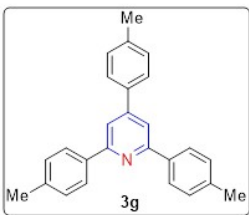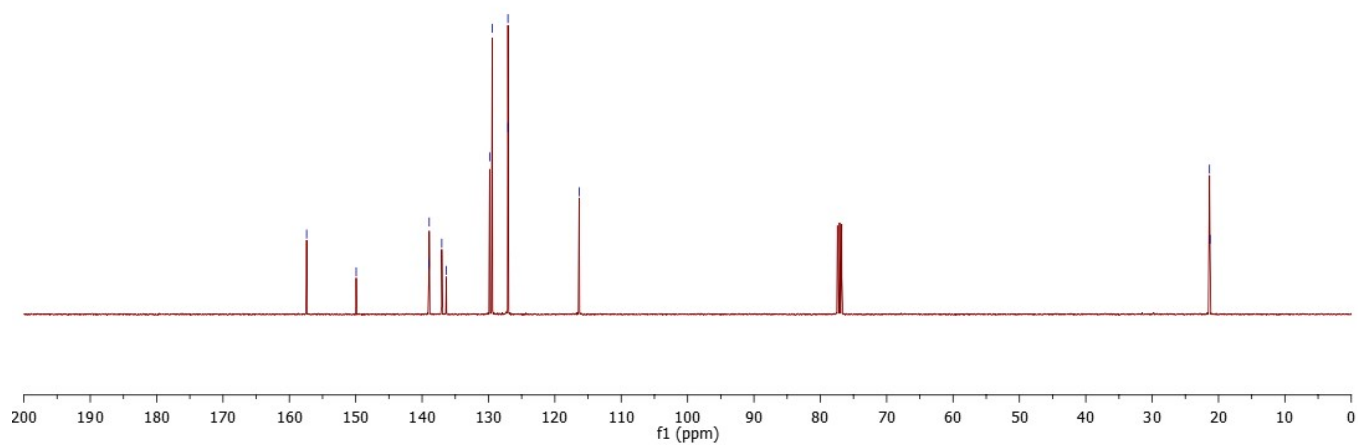

RAN\_22

8.07  
8.06  
7.69  
7.53  
7.51  
7.24  
7.22  
7.11  
7.09  
7.06

2.34

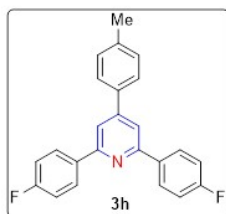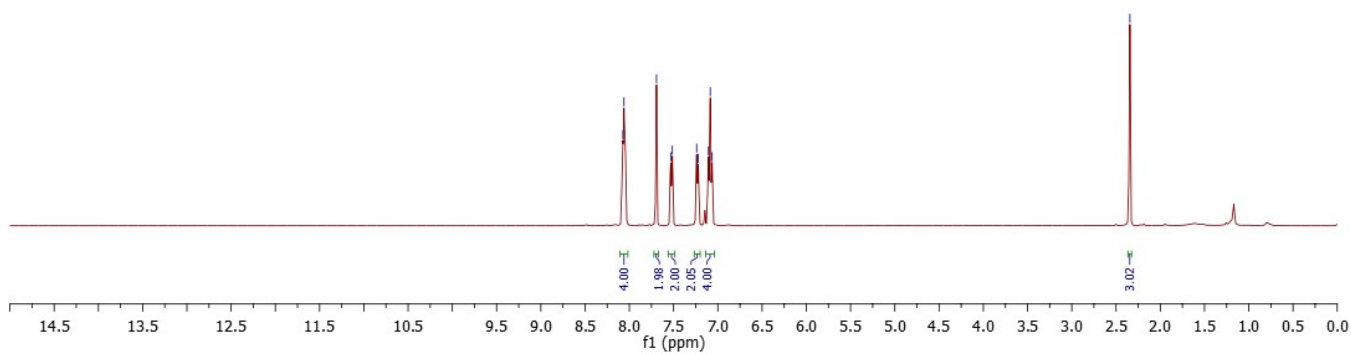

RAN\_22

164.89  
162.42  
156.44  
150.34  
139.28  
135.86  
135.68  
135.65  
129.89  
128.95  
128.87  
126.98  
116.47  
115.71  
115.50

21.26

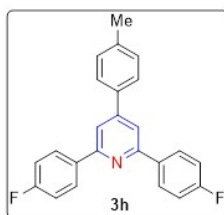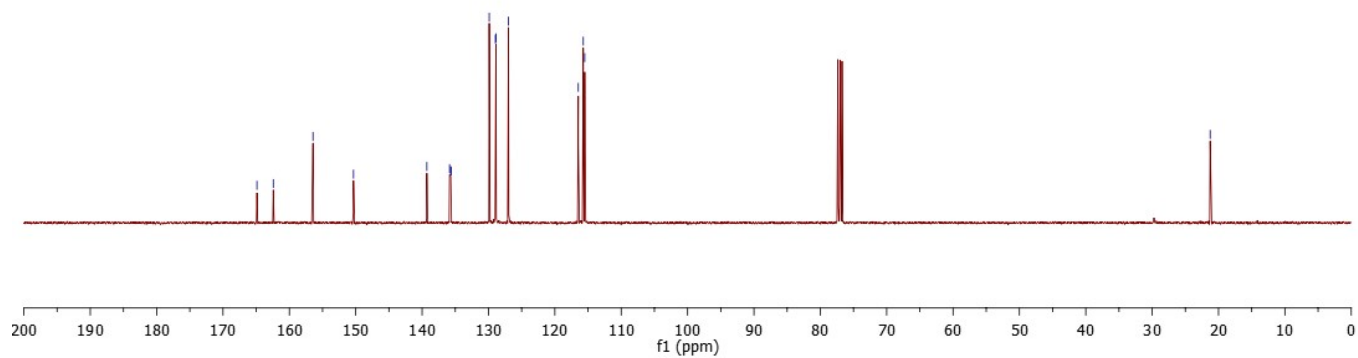

RAN\_21

8.14  
7.84  
7.65  
7.51  
7.49  
7.37  
7.35

2.48

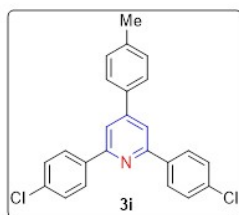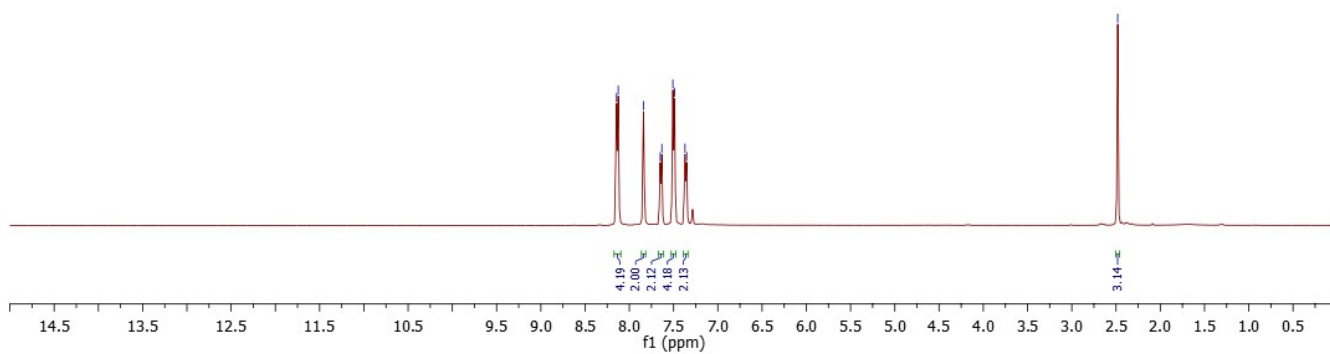

RAN\_21

156.26  
150.37  
139.37  
137.87  
135.69  
135.24  
129.91  
128.89  
126.97  
116.81

21.29

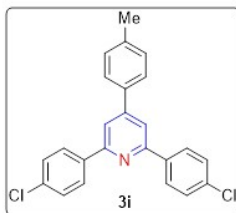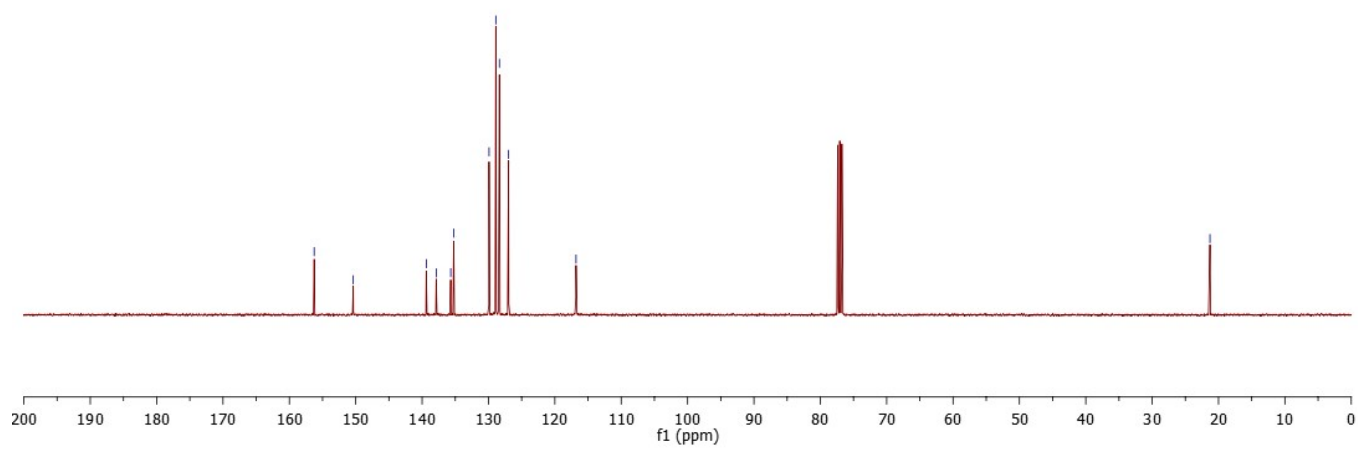



RAN\_15

8.10  
7.77  
7.63  
7.61  
7.46  
7.43  
7.41  
7.37  
7.36  
6.97

3.79

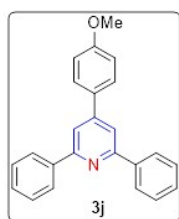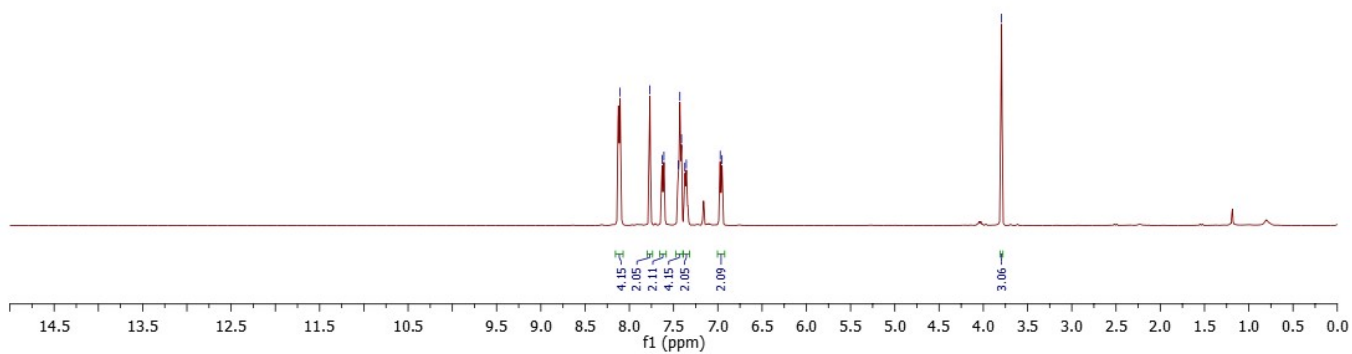

RAN\_15

160.53  
157.47  
149.70  
139.71  
131.31  
129.00  
128.70  
128.35  
127.17  
116.64  
114.56

55.44

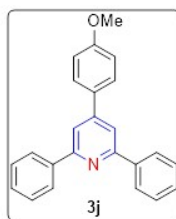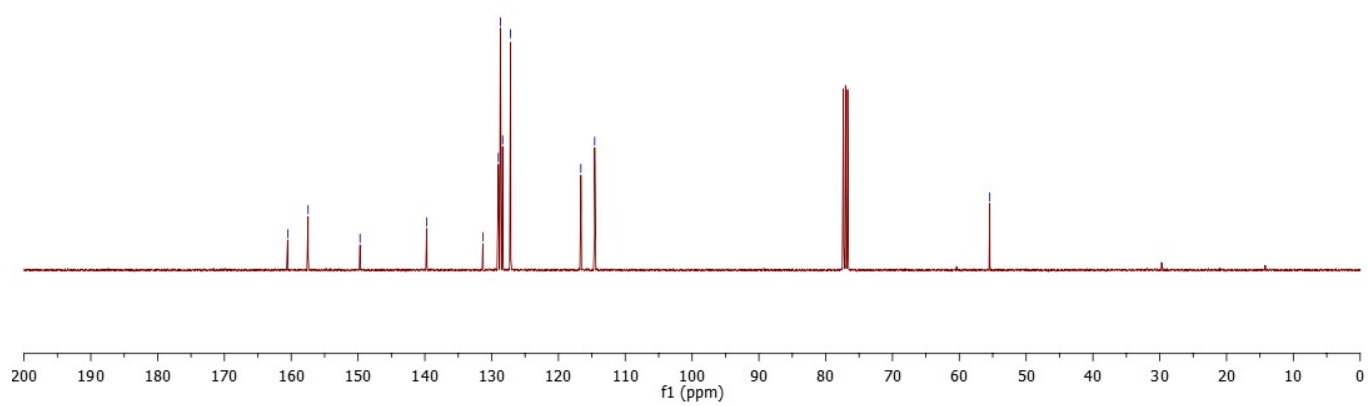

RAN-16

8.02  
8.01  
7.72  
7.63  
7.61  
7.54  
7.52  
6.97  
6.95

3.80

2.35

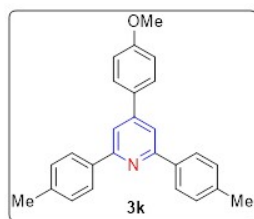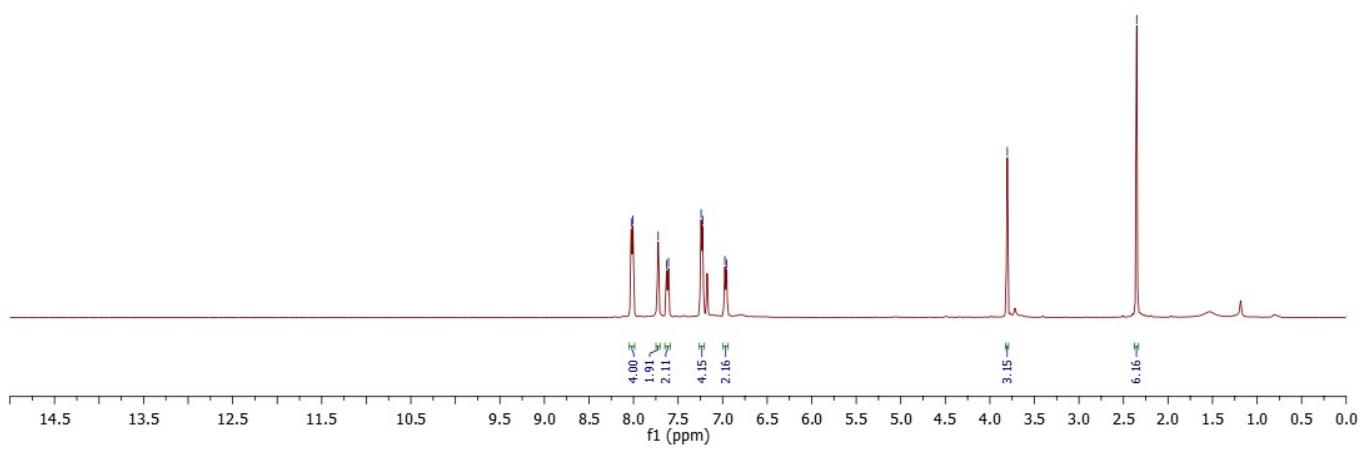

RAN-16

160.42  
157.37

149.47

138.87  
137.06

131.56  
129.39  
128.32  
127.00

116.03  
114.52

55.43

21.31

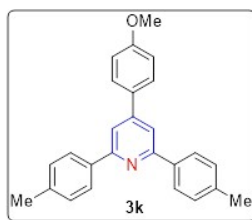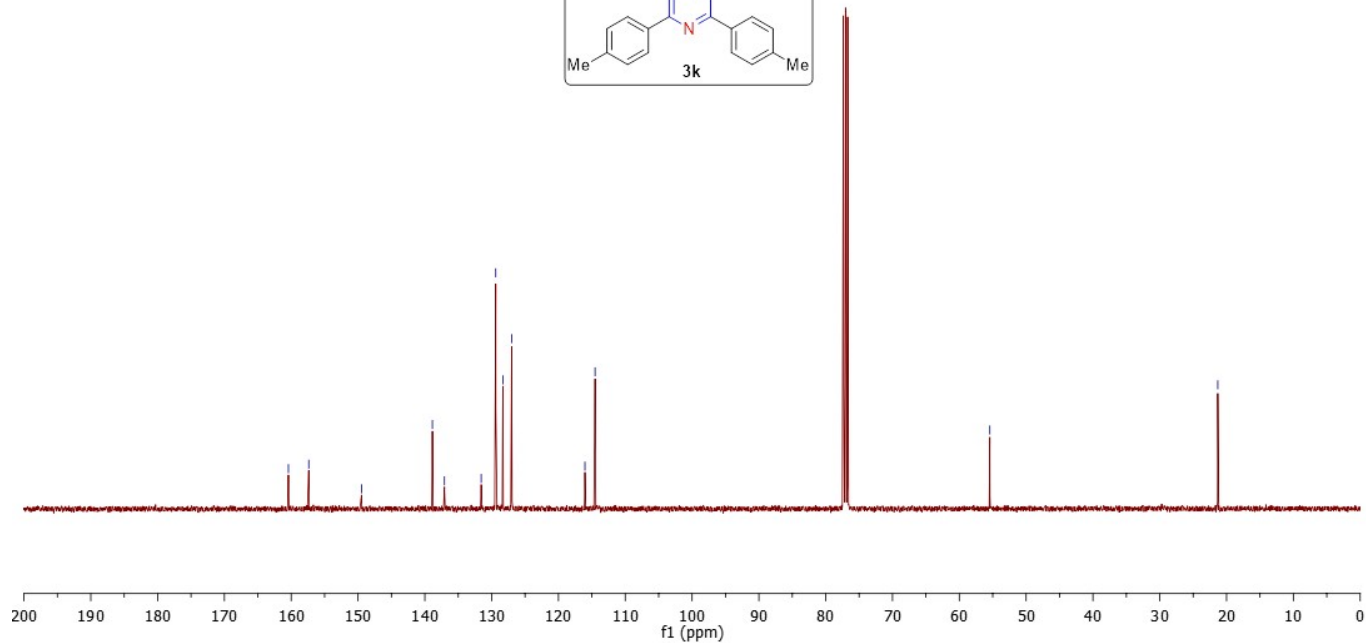

RAN\_18

8.08  
8.07  
7.69  
7.60  
7.58  
7.12  
7.10  
7.08  
6.97  
6.95

3.80

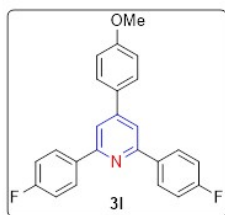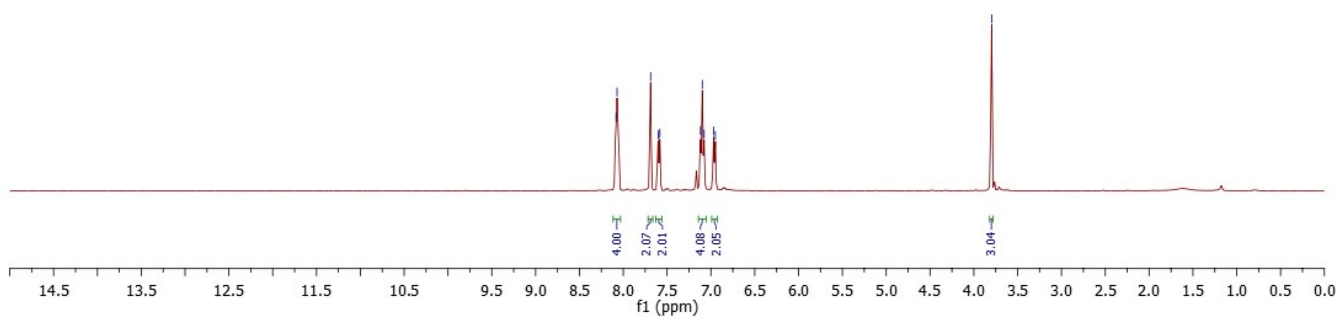

RAN\_18

164.87  
162.40  
160.63  
156.44  
149.93

135.72  
135.68  
131.05  
128.94  
128.86  
128.32

116.19  
115.70  
115.49  
114.61

55.44

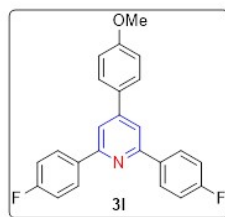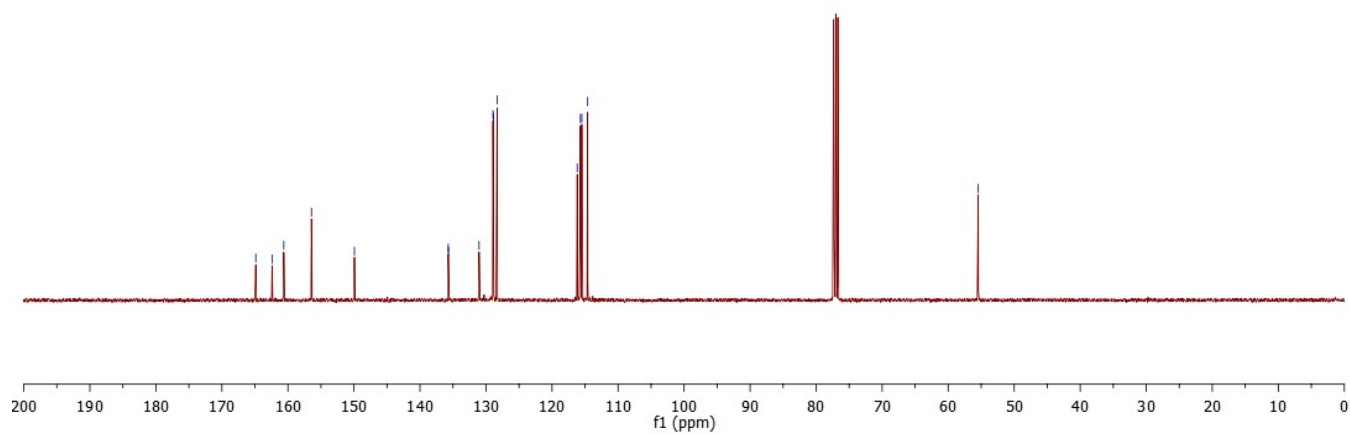

RAN\_17

8.15  
8.13  
7.84  
7.72  
7.70  
7.51  
7.49  
7.29  
7.07

3.92

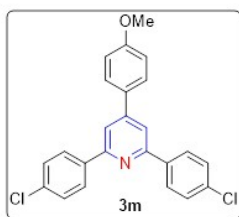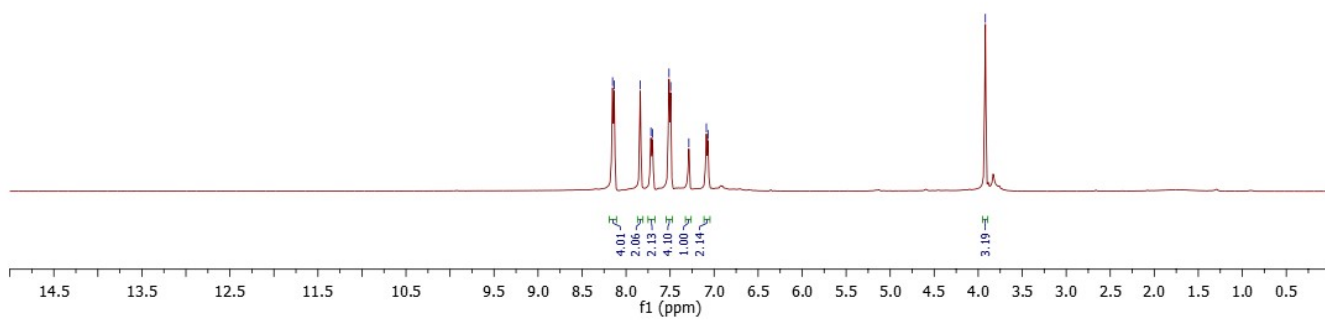

RAN\_17

160.67

156.31

150.02

137.94

135.22

130.90

128.89

128.36

128.32

116.56

114.63

55.46

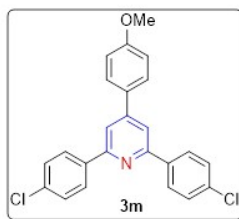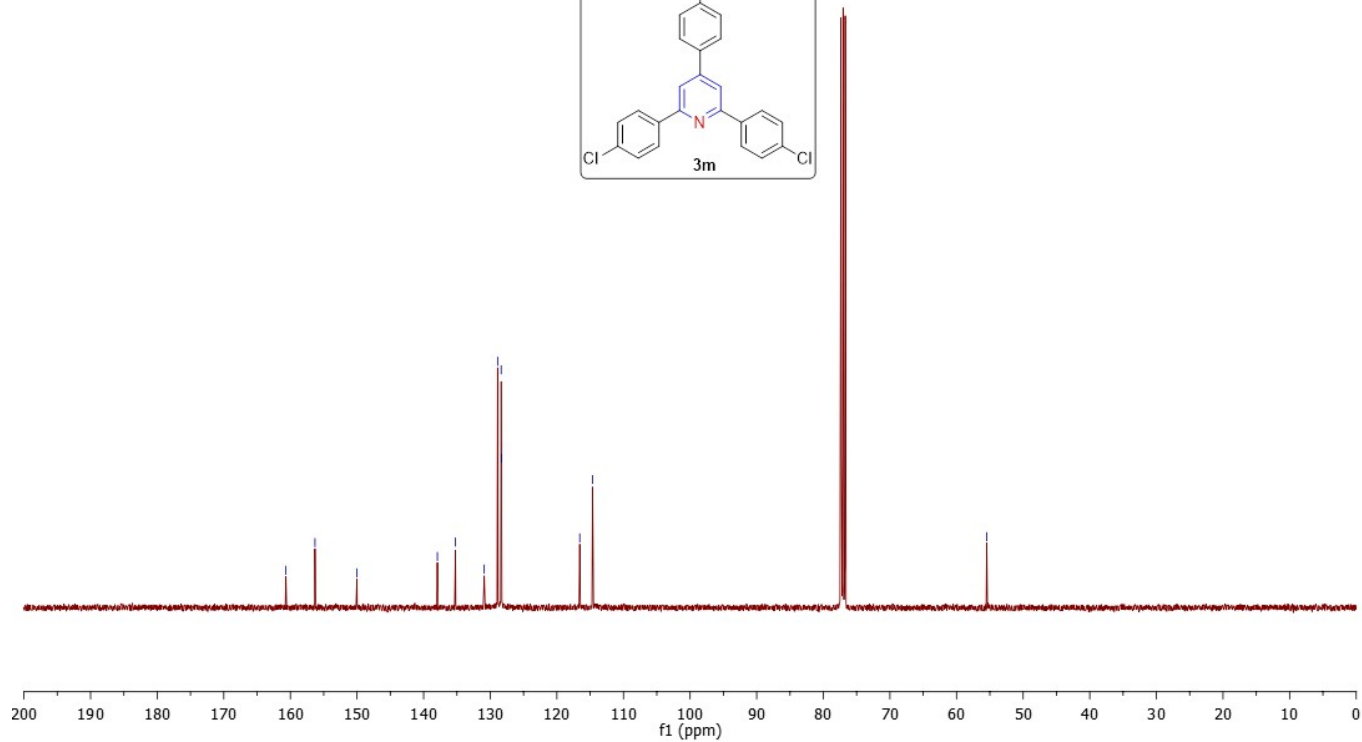



RAN\_07

8.13  
8.11  
7.77  
7.67  
7.65  
7.46  
7.45  
7.43  
7.30  
7.28  
7.18  
7.15  
7.13

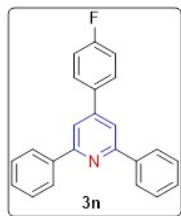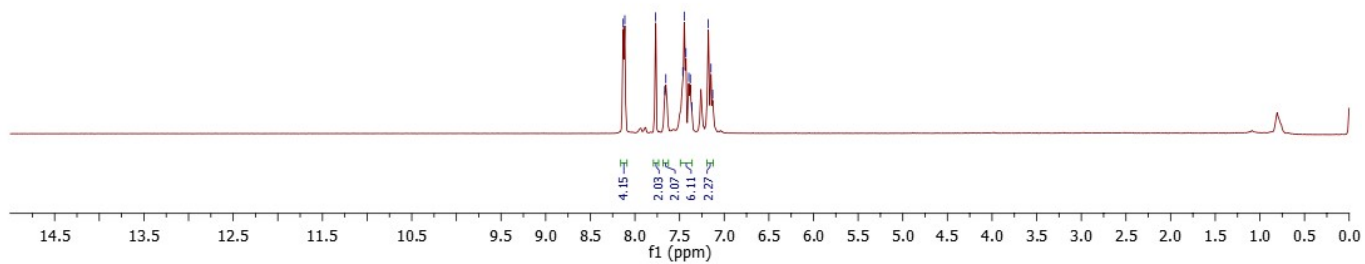

RAN\_07

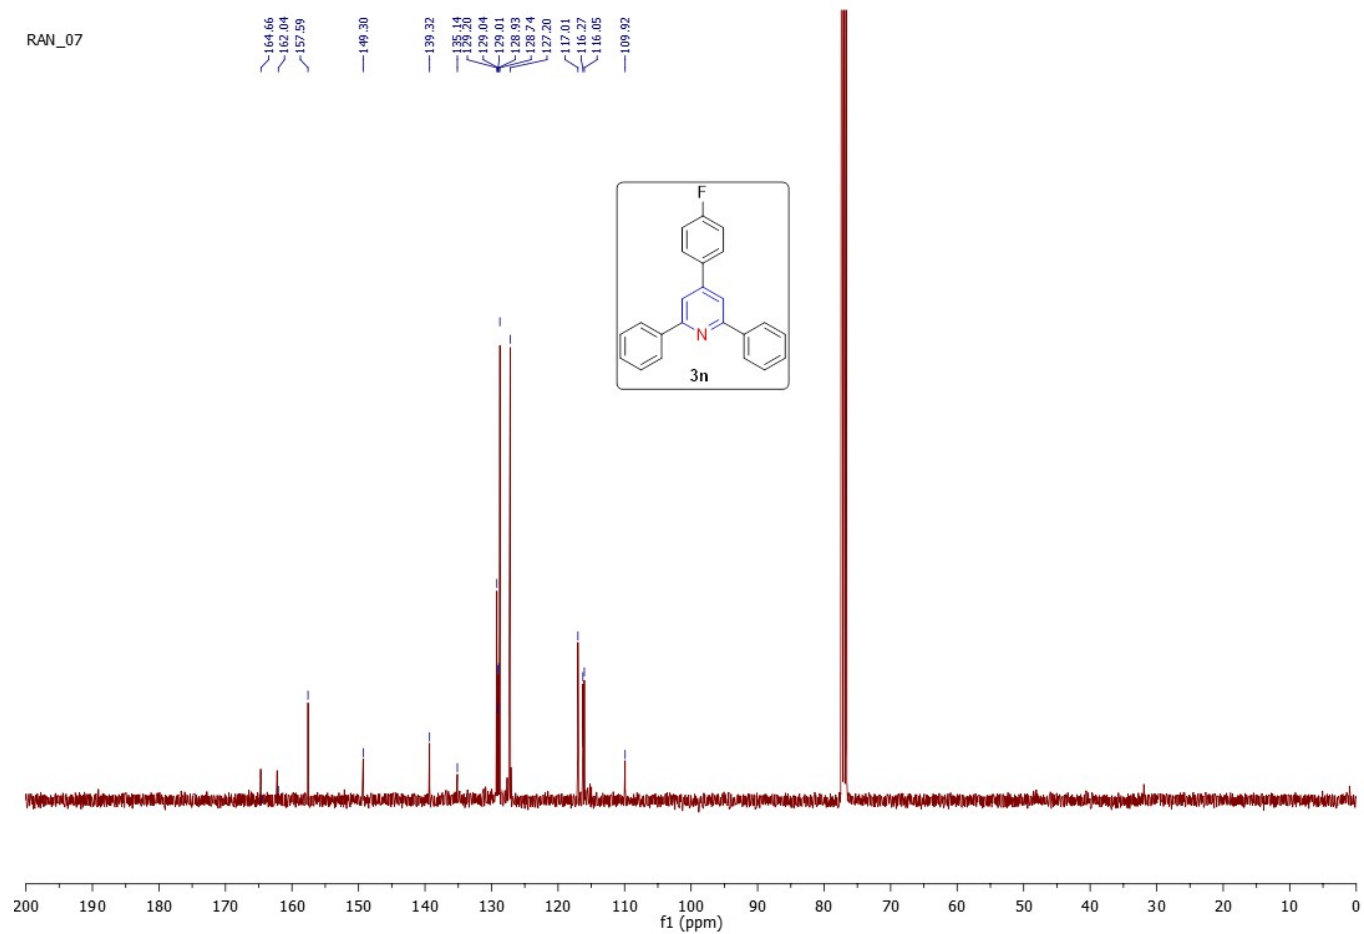

RAN\_08

8.02  
8.00  
7.70  
7.64  
7.63  
7.25  
7.23  
7.15  
7.13  
7.11

2.35

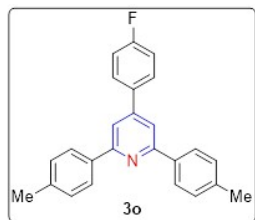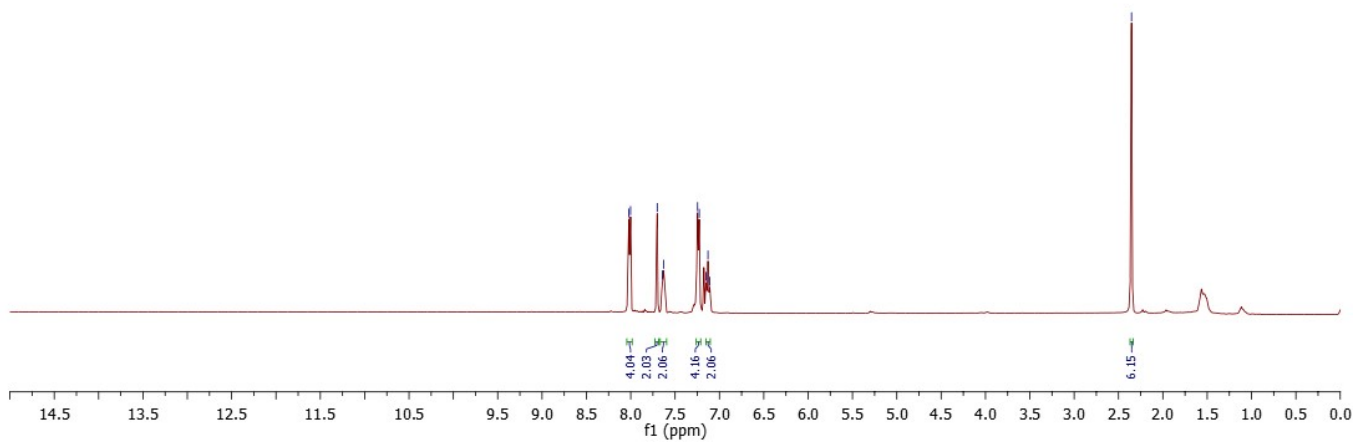

RAN\_08

164.63  
162.15  
157.49  
149.07  
139.12  
136.68  
129.43  
128.97  
128.89  
127.04  
116.35  
116.18  
115.96

21.32

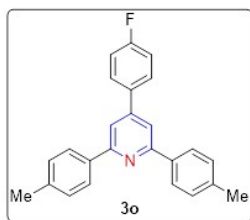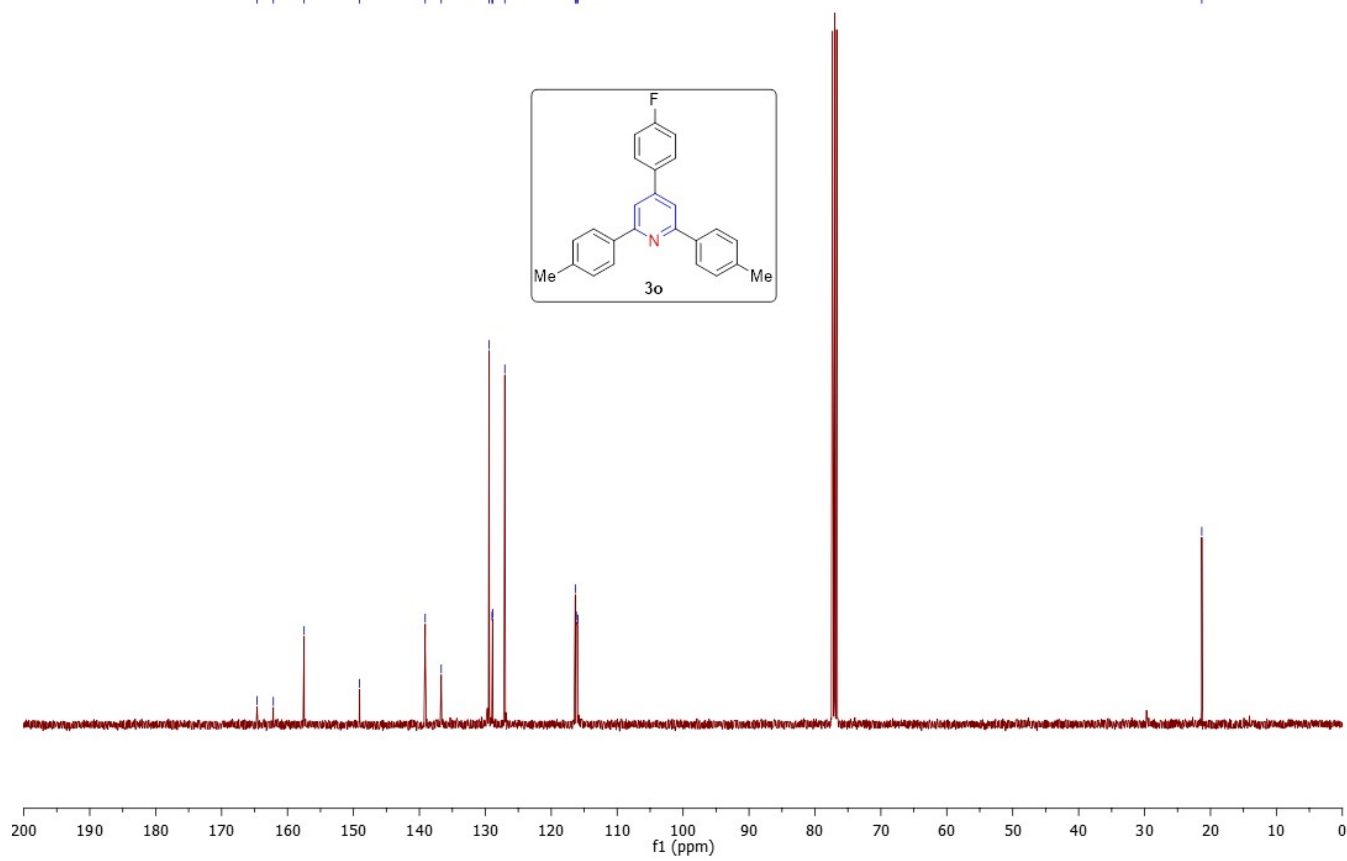

RAN-10

8.21  
8.20  
7.80  
7.77  
7.25  
7.23  
7.20

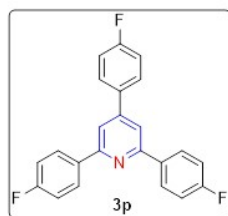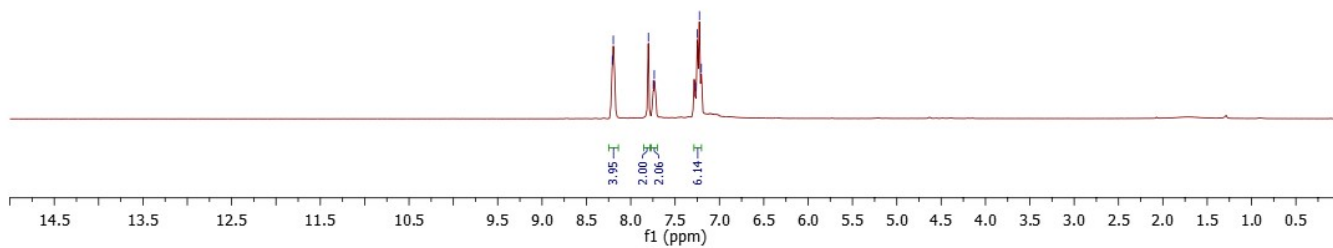

RAN-10

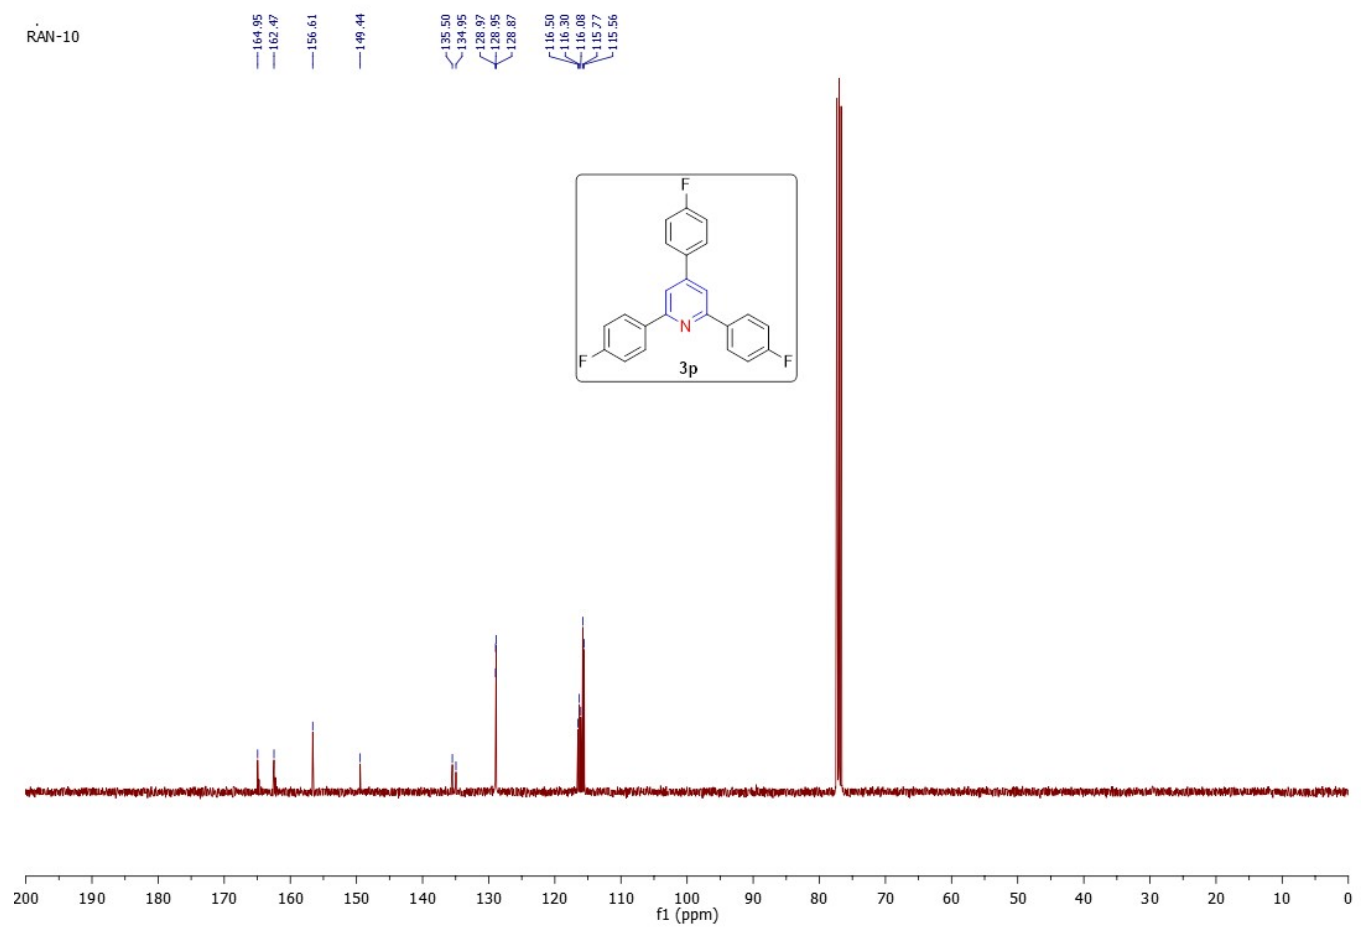

RAN\_09

8.06  
7.73  
7.64  
7.63  
7.47  
7.45  
7.42

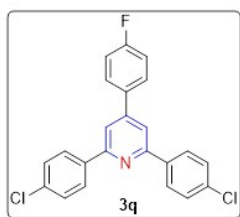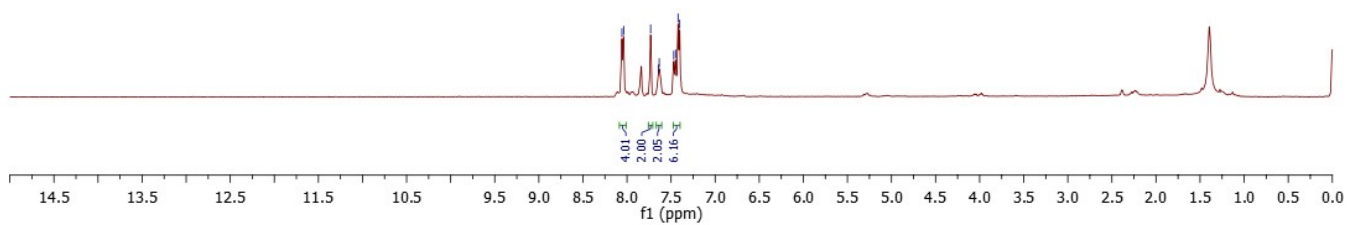

RAN\_09

163.98  
163.72  
156.46  
149.88  
137.56  
135.47  
129.37  
129.21  
128.97  
128.54  
128.40  
118.96  
116.36  
116.14  
115.55  
115.34

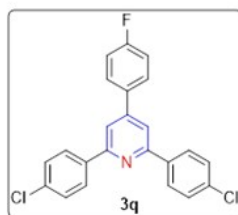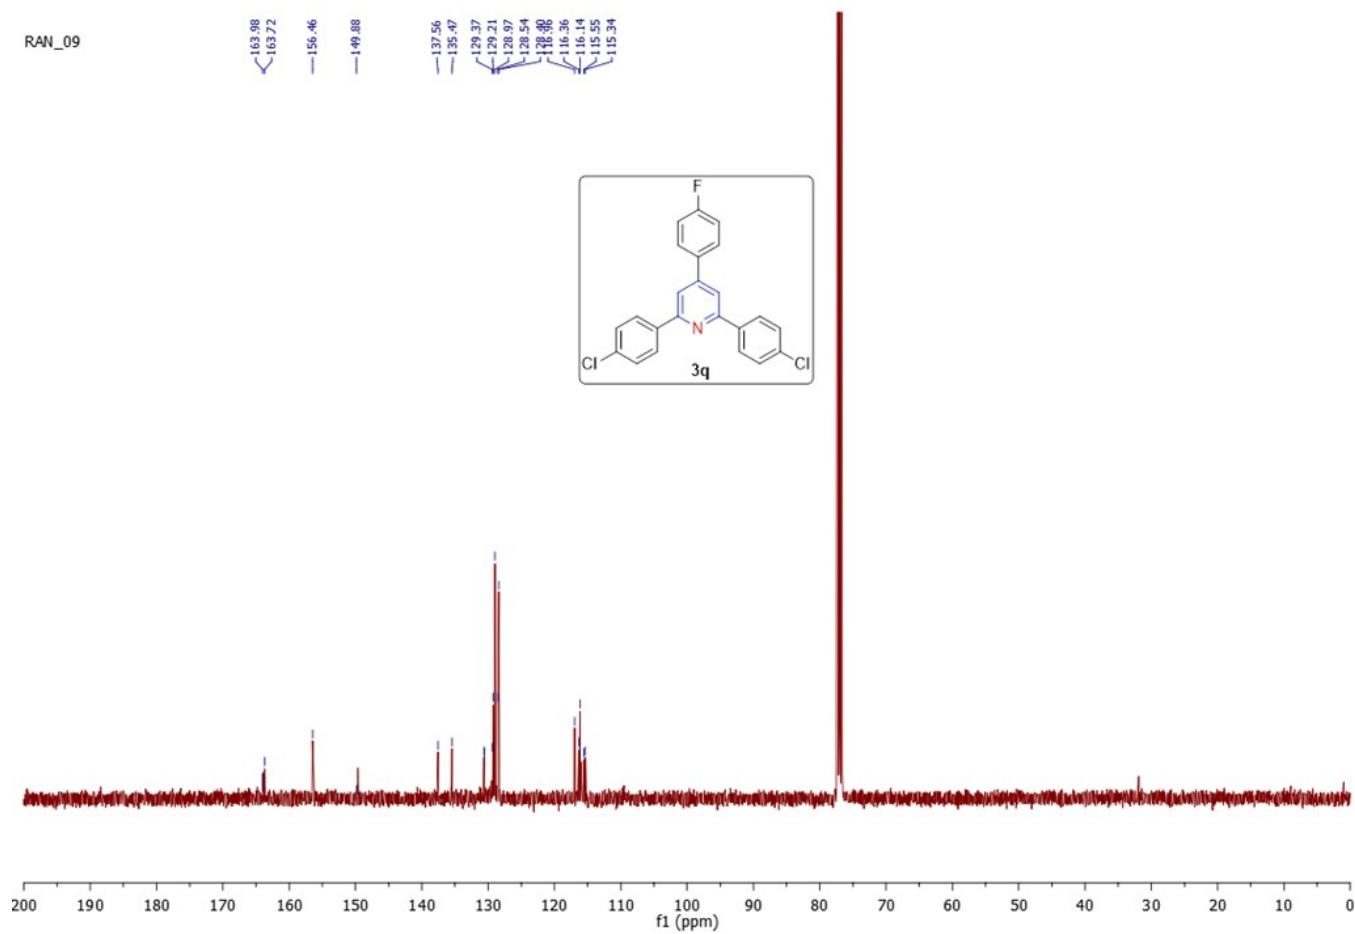



RAN\_11

7.87  
7.85  
7.60  
7.59  
7.29  
7.27  
7.25  
7.10  
7.08  
7.05  
7.02  
6.98  
6.93  
6.91

—3.78

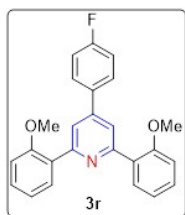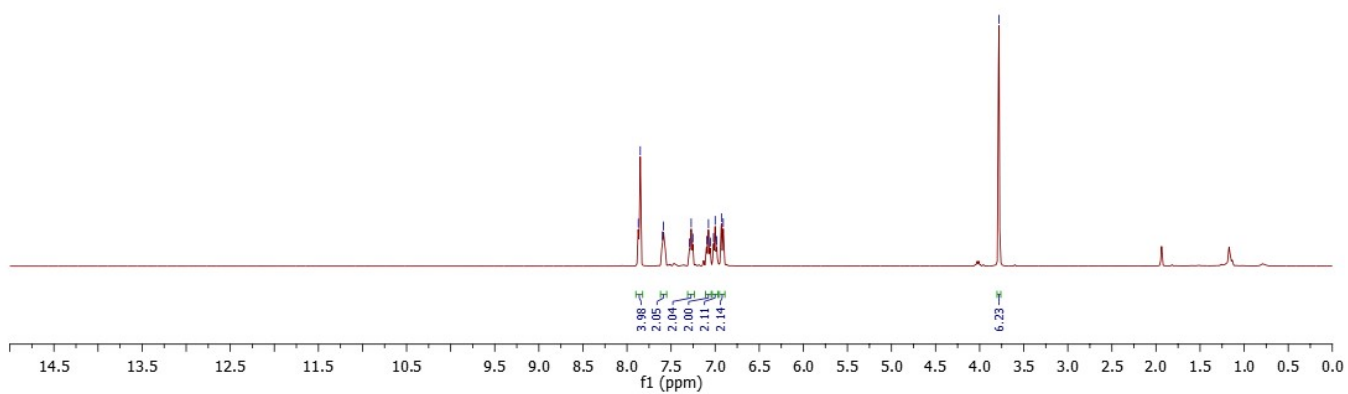

RAN\_11

164.48  
162.01  
157.16  
156.09  
146.70  
135.61  
135.58  
131.61  
129.87  
129.53  
129.09  
129.01  
121.23  
121.14  
116.05  
115.84  
111.52

55.77

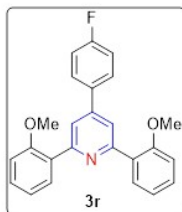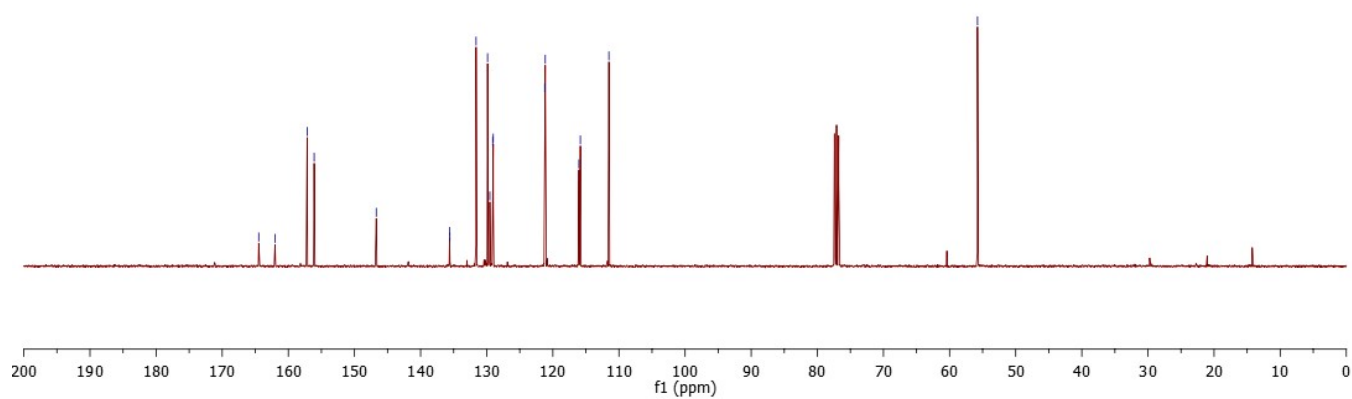

RAN\_12

8.05  
8.03  
7.59  
7.11  
7.09  
7.00  
6.94  
6.92

3.77

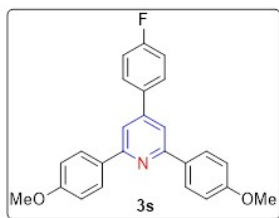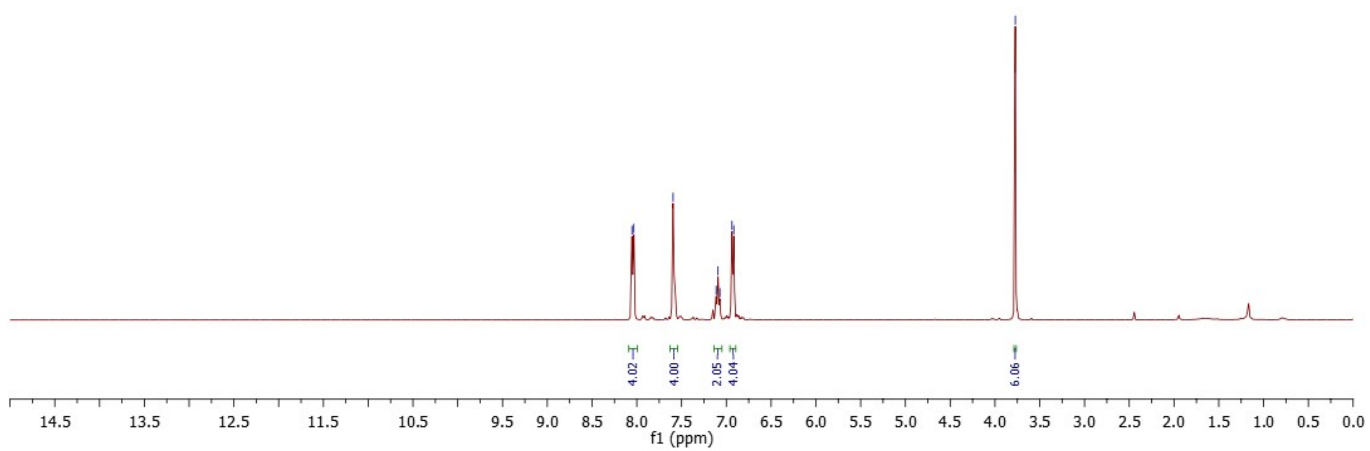

RAN\_12

164.89  
162.11  
160.61  
157.04

148.95

135.46  
135.45  
132.22  
128.94  
128.86  
128.39

116.14  
115.92  
115.45  
114.08

55.38

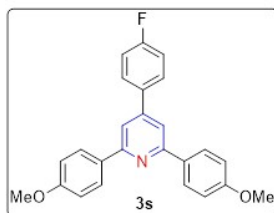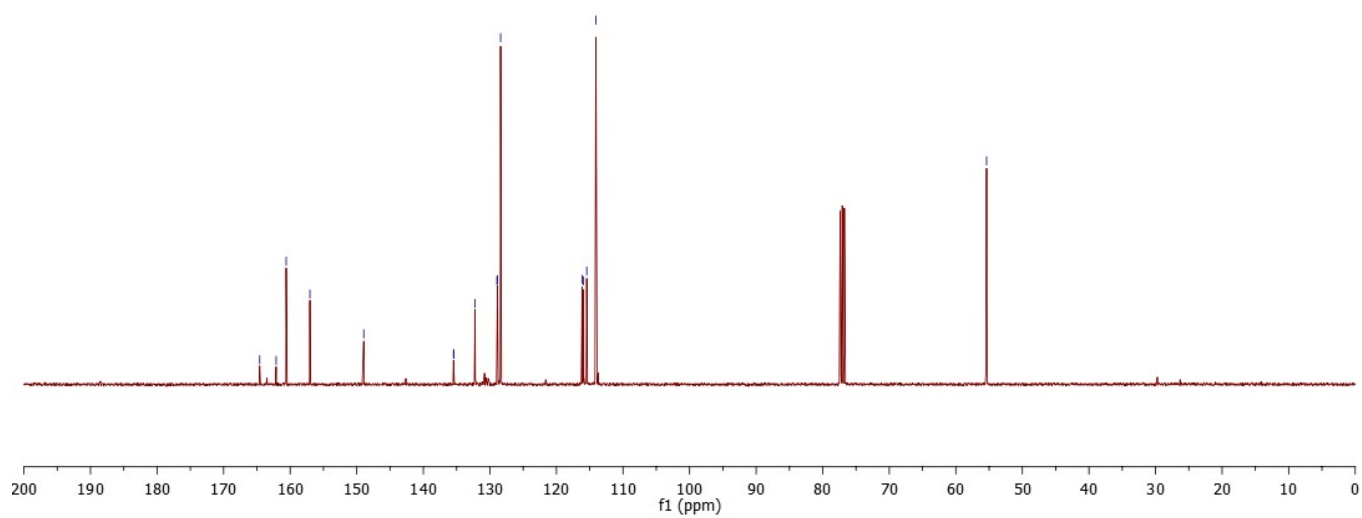

Supplement: d3ob00625e1.pdf [file d3ob00625e1.pdf]
